# Supplementary material for: Intelligent Flow Friction Estimation
Source: Hindawi journal article supplement (doi:10.1155/2016/5242596), 2016-01-01
Supplement: f1 [file 5242596.f1.zip]

Approximations of the Colebrook equation for flow friction mentioned in text

MATLAB and MS Excel codes for the shown approximations

Re-Reynolds number (dimensionless),

$\varepsilon/D$ -Relative roughness (dimensionless),

$\lambda$ -Darcy friction factor (dimensionless)

(Re-Reynolds number, RelEpsilon-Relative roughness; in MS Excel: ‘A1: Re and B1: RelEpsilon’)

## 1. Buzzelli approximation

$$\left. \begin{aligned} \frac{1}{\sqrt{\lambda}} &\approx A_1 - \frac{A_1 + 2 \cdot \log_{10}\left(\frac{A_2}{\text{Re}}\right)}{1 + \frac{2.18}{A_2}} \\ A_1 &\approx \frac{(0.774 \cdot \ln(\text{Re})) - 1.41}{\left(1 + 1.32 \cdot \sqrt{\frac{\varepsilon}{D}}\right)} \\ A_2 &\approx \frac{1}{3.7} \cdot \frac{\varepsilon}{D} \cdot \text{Re} + 2.51 \cdot A_1 \end{aligned} \right\}$$

MATLAB:

```
function Lambda=Lambda(Re,RelEpsilon)
A1 = ((0.774.*log(Re))-1.41)./(1+1.32.*sqrt(RelEpsilon));
A2 = (RelEpsilon./3.7).*Re+2.51.*A1;
Lambda = (A1-((A1+2.*log10(A2./Re))/(1+2.18./A2))).^-2;
```

MS Excel:

```
=((((0.774*LN(A1))-1.41)/(1+1.32*SQRT(B1)))-((((0.774*LN(A1))-1.41)/(1+1.32*SQRT(B1)))+2*LOG10(((1/3.7)*B1*A1+2.51*(((0.774*LN(A1))-1.41)/(1+1.32*SQRT(B1)))/A1))/(1+2.18/(B1*(1/3.7)*A1+2.51*(((0.774*LN(A1))-1.41)/(1+1.32*SQRT(B1))))))
cell C1

=POWER(1/C1,2)
```

Buzzelli, D. (2008). “Calculating friction in one step.” *Mach. Des.*, 80(12), 54–55.

## 2. Vatankhah and Kouchakzadeh

$$\left. \begin{aligned} \frac{1}{\sqrt{\lambda}} &\approx 0.8686 \cdot \ln \left( \frac{0.4587 \cdot \text{Re}}{(A_3 - 0.31)^{A_4}} \right) \\ A_3 &\approx 0.124 \cdot \text{Re} \cdot \frac{\varepsilon}{D} + \ln(0.4587 \cdot \text{Re}) \\ A_4 &\approx \frac{A_3}{A_3 + 0.9633} \end{aligned} \right\}$$

MATLAB:

```
function Lambda=Lambda(Re,RelEpsilon)
G = 0.124.*Re.*RelEpsilon+log(0.4587.*Re);
Lambda = (0.8686.*log(0.4587.*Re./(G-0.31)).^(G/(G+0.9633))))).^ -2;
```

MS Excel:

```
=0.8686*LN(0.4587*A1/POWER((0.124*A1*B1+LN(0.4587*A1))-
0.31,(0.124*A1*B1+LN(0.4587*A1))/((0.124*A1*B1+LN(0.4587*A1))+0.9633))))
```

cell C1

```
=POWER(1/C1,2)
```

Vatankhah, A.R., Kouchakzadeh, S. (2008). “Discussion of ‘Turbulent flow friction factor calculation using a mathematically exact alternative to the Colebrook-White equation.’ by Jagadeesh R. Sonnad and Chetan T. Goudar.” *J. Hydraul. Eng. ASCE*, 134(8), 1187. [http://dx.doi.org/10.1061/\(ASCE\)0733-9429\(2008\)134:8\(1187\)](http://dx.doi.org/10.1061/(ASCE)0733-9429(2008)134:8(1187))

### 3. Romeo, Royo and Monzón approximation

$$\left. \begin{aligned} \frac{1}{\sqrt{\lambda}} &\approx -2 \cdot \log_{10} \left( \frac{1}{3.7065} \cdot \frac{\varepsilon}{D} - \frac{5.0272}{\text{Re}} \cdot A_5 \right) \\ A_5 &\approx \log_{10} \left( \frac{1}{3.827} \cdot \frac{\varepsilon}{D} - \frac{4.567}{\text{Re}} \cdot A_6 \right) \\ A_6 &\approx \log_{10} \left( \left( \frac{1}{7.7918} \cdot \frac{\varepsilon}{D} \right)^{0.9924} + \left( \frac{5.3326}{208.815 + \text{Re}} \right)^{0.9345} \right) \end{aligned} \right\}$$

MATLAB:

```
function Lambda=Lambda(Re,RelEpsilon)
Lambda = (-2.*log10((RelEpsilon./3.7065)-
(5.0272./Re).*(log10((RelEpsilon./3.827)-
(4.567./Re).*(log10((RelEpsilon./7.7918).^0.9924+(5.3326./(208.815+Re)).^0.9345))))).^2;
```

MS Excel:

```
=-2*LOG10(B1*(1/3.7065)-5.0272/A1*LOG10(B1*(1/3.827)-
(4.567/A1)*LOG10(POWER(B1*(1/7.7918),0.9924)+POWER(5.3326/(208.815+A1),0.9345))))
cell C1

=POWER(1/C1,2)
```

Romeo, E., Royo, C., Monzón, A. (2002). "Improved explicit equations for estimation of the friction factor in rough and smooth pipes." *Chem. Eng. J.*, 86(3), 369–374. [http://dx.doi.org/10.1016/S1385-8947\(01\)00254-6](http://dx.doi.org/10.1016/S1385-8947(01)00254-6)

#### 4. Serghides approximation

$$\left. \begin{aligned} \frac{1}{\sqrt{\lambda}} &\approx A_7 - \frac{(A_8 - A_7)^2}{A_9 - 2 \cdot A_8 + A_7} \\ A_7 &\approx -2 \cdot \log_{10} \left( \frac{1}{3.7} \cdot \frac{\varepsilon}{D} + \frac{12}{\text{Re}} \right) \\ A_8 &\approx -2 \cdot \log_{10} \left( \frac{1}{3.7} \cdot \frac{\varepsilon}{D} + \frac{2.51 \cdot A_7}{\text{Re}} \right) \\ A_9 &\approx -2 \cdot \log_{10} \left( \frac{1}{3.7} \cdot \frac{\varepsilon}{D} + \frac{2.51 \cdot A_8}{\text{Re}} \right) \end{aligned} \right\}$$

MATLAB:

```
function Lambda=Lambda(Re,RelEpsilon)
A7 = -2*log10(RelEpsilon./3.7+12./Re);
A8 = -2*log10(RelEpsilon./3.7+2.51.*A7./Re);
A9 = -2*log10(RelEpsilon./3.7+2.51.*A8./Re);
Lambda = (A7-((A8-A7).^2)/(A9-2.*A8+A7)).^-2;
```

MS Excel:

```
=POWER(-2*LOG10(B1*(1/3.7)+12/A1)-POWER(-2*LOG10(B1*(1/3.7)+2.51*(-
2*LOG10(B1*(1/3.7)+12/A1))/A1)-2*LOG10(B1*(1/3.7)+12/A1),2)/((-
2*LOG(B1*(1/3.7)+(2.51*(-2*LOG10(B1*(1/3.7)+(2.51*(-
2*LOG10(B1*(1/3.7)+12/A1))/A1))/A1)))/A1))-2*(-2*LOG10(B1*(1/3.7)+2.51*(-
2*LOG10(B1*(1/3.7)+12/A1))/A1))+(-2*LOG10(B1*(1/3.7)+12/A1))),-2)
```

Serghides, T.K. (1984). "Estimate friction factor accurately." *Chem. Eng. (New York)*, 91(5), 63–64.

## 5. Zigrang and Sylvester approximation

$$\left. \begin{aligned} \frac{1}{\sqrt{\lambda}} &\approx -2 \cdot \log_{10} \left( \frac{1}{3.7} \cdot \frac{\varepsilon}{D} - \frac{5.02}{\text{Re}} \cdot A_{10} \right) \\ A_{10} &\approx \log_{10} \left( \frac{1}{3.7} \cdot \frac{\varepsilon}{D} - \frac{5.02}{\text{Re}} \cdot A_{11} \right) \\ A_{11} &\approx \log_{10} \left( \frac{1}{3.7} \cdot \frac{\varepsilon}{D} + \frac{13}{\text{Re}} \right) \end{aligned} \right\}$$

MATLAB:

```
function Lambda=Lambda(Re,RelEpsilon)
Lambda = (-2.*log10((RelEpsilon./3.7) -
(5.02./Re).*log10((RelEpsilon./3.7) -
(5.02./Re).*log10(RelEpsilon./3.7+13./Re))))).^2;
```

MS Excel:

=-2\*LOG10((1/3.7)\*B1-(5.02/A1)\*LOG10((1/3.7)\*B1-(5.02/A1)\*LOG10((1/3.7)\*B1+13/A1)))  
cell C1

=POWER(1/C1,2)

Zigrang, D.J., Sylvester, N.D. (1982). “Explicit approximations to the solution of Colebrook’s friction factor equation.” *AIChE J.*, 28(3), 514–515. <http://dx.doi.org/10.1002/aic.690280323>

## 6. Čojbašić and Brkić approximation-Improved Romeo et al.

$$\left. \begin{aligned} \frac{1}{\sqrt{\lambda}} &\approx -2 \cdot \log_{10} \left( \frac{1}{3.7106} \cdot \frac{\varepsilon}{D} - \frac{5}{\text{Re}} \cdot A_{12} \right) \\ A_{12} &\approx \log_{10} \left( \frac{1}{3.8597} \cdot \frac{\varepsilon}{D} - \frac{4.795}{\text{Re}} \cdot A_{13} \right) \\ A_{13} &\approx \log_{10} \left( \left( \frac{1}{7.646} \cdot \frac{\varepsilon}{D} \right)^{0.9685} + \left( \frac{4.9755}{206.2795 + \text{Re}} \right)^{0.8759} \right) \end{aligned} \right\}$$

MATLAB:

```
function Lambda=Lambda(Re,RelEpsilon)
Lambda = (-2.*log10((RelEpsilon./3.7106)-
(5./Re).*(log10((RelEpsilon./3.8597)-
(4.795./Re).*(log10((RelEpsilon./7.646).^0.9685+(4.9755./(206.2795+Re)).^0.8759))))).^2;
```

MS Excel:

```
=-2*LOG10(B1*(1/3.7106)-5/A1*LOG10(B1*(1/3.8597)-
(4.795/A1)*LOG10(POWER(B1*(1/7.646),0.9685)+POWER(4.9755/(206.2795+A1),0.8759))))
cell C1

=POWER(1/C1,2)
```

Čojbašić, Ž, and Brkić, D. (2013). "Very accurate explicit approximations for calculation of the Colebrook friction factor." *Int. J. Mech. Sci.*, 67, 10-13.

<http://dx.doi.org/10.1016/j.ijmecsci.2012.11.017>

## 7. Čojbašić and Brkić approximation-Improved Seghides

$$\left. \begin{aligned} \frac{1}{\sqrt{\lambda}} &\approx A_{14} - \frac{(A_{15} - A_{14})^2}{A_{16} - 2 \cdot A_{15} + A_{14}} \\ A_{14} &\approx -2 \cdot \log_{10} \left( \frac{1}{3.71} \cdot \frac{\varepsilon}{D} + \frac{12.585}{\text{Re}} \right) \\ A_{15} &\approx -2 \cdot \log_{10} \left( \frac{1}{3.71} \cdot \frac{\varepsilon}{D} + \frac{2.51 \cdot A_{14}}{\text{Re}} \right) \\ A_{16} &\approx -2 \cdot \log_{10} \left( \frac{1}{3.71} \cdot \frac{\varepsilon}{D} + \frac{2.51 \cdot A_{15}}{\text{Re}} \right) \end{aligned} \right\}$$

MATLAB:

```
function Lambda=Lambda(Re,RelEpsilon)
A14 = -2*log10(RelEpsilon./3.71+12.585./Re);
A15 = -2*log10(RelEpsilon./3.71+2.51.*A14./Re);
A16 = -2*log10(RelEpsilon./3.71+2.51.*A15./Re);
Lambda = (A14-((A15-A14).^2)/(A16-2.*A15+A14)).^-2;
```

MS Excel:

```
=POWER(-2*LOG10(B1*(1/3.71)+12.585/A1)-POWER(-2*LOG10(B1*(1/3.71)+2.51*(-2*LOG10(B1*(1/3.71)+12.585/A1))/A1)-2*LOG10(B1*(1/3.71)+12.585/A1),2)/((-2*LOG10(B1*(1/3.71)+(2.51*(-2*LOG10(B1*(1/3.71)+(2.51*(-2*LOG10(B1*(1/3.71)+12.585/A1))/A1))/A1)))-2*(-2*LOG10(B1*(1/3.71)+2.51*(-2*LOG10(B1*(1/3.71)+12.585/A1))/A1))+(-2*LOG10(B1*(1/3.71)+12.585/A1))),-2)
```

Čojbašić, Ž, and Brkić, D. (2013). “Very accurate explicit approximations for calculation of the Colebrook friction factor.” *Int. J. Mech. Sci.*, 67, 10-13.

<http://dx.doi.org/10.1016/j.ijmecsci.2012.11.017>
