# Supplementary material for: Intelligent Flow Friction Estimation
Source: Comput Intell Neurosci. 2016 Apr 3;2016:5242596. doi: 10.1155/2016/5242596 (PMC4834174; doi:10.1155/2016/5242596)
Supplement: Supplementary file 1 — Electronic Appendix A contains MS Excel file, containing set of 90 thousand combinations used for training, validation and testing of the Artificial Neural Network (ANN). Electronic Appendix B is the Artificial Neural Network (ANN) generated in MathWorks MATLAB. Electronic Appendix C is PDF file with all approximations of the Colebrook equation mentioned through text with their MathWorks MATLAB codes and MS Excel codes. [file 5242596.f1.zip]

Archive with 3 entries (3 files):
- El._Appendix_A_CIN_1555774.xlsx
- El._Appendix_B_CIN_1555774.mat
- El._Appendix_C_CIN_1555776.pdf
