# Supplementary material for: Intelligent Flow Friction Estimation
Source: Comput Intell Neurosci. 2016 Apr 3;2016:5242596. doi: 10.1155/2016/5242596 (PMC4834174; doi:10.1155/2016/5242596)
Supplement: Supplementary file 1 — Electronic Appendix A contains MS Excel file, containing set of 90 thousand combinations used for training, validation and testing of the Artificial Neural Network (ANN). Electronic Appendix B is the Artificial Neural Network (ANN) generated in MathWorks MATLAB. Electronic Appendix C is PDF file with all approximations of the Colebrook equation mentioned through text with their MathWorks MATLAB codes and MS Excel codes. [file 5242596.f1.zip › El._Appendix_A_CIN_1555774.xlsx]

## Sheet: 90k triplets
Re	ε/D	λ-1/2		log10(Re)	-log10(ε/D)	λ
5011.87	0.1	3.08807	Remark for calculation in column C	3.7	1	0.104864
5011.87	0.0958529	3.12229	in Excel Optinos, Formulas	3.7	1.01839	0.102578
5011.87	0.0918778	3.15638	Circular References must be enabled	3.7	1.03679	0.100374
5011.87	0.0880676	3.19034	Maximum iterations: 32767	3.7	1.05518	0.0982486
5011.87	0.0844153	3.22417	Maximum change: 0.000000001	3.7	1.07358	0.0961979
5011.87	0.0809146	3.25785	MS Excel 2007	3.7	1.09197	0.0942188
5011.87	0.077559	3.29139		3.7	1.11037	0.0923085
5011.87	0.0743426	3.32478		3.7	1.12876	0.0904639
5011.87	0.0712595	3.358		3.7	1.14716	0.0886825
5011.87	0.0683043	3.39107		3.7	1.16555	0.0869616
5011.87	0.0654717	3.42396		3.7	1.18395	0.0852989
5011.87	0.0627565	3.45667		3.7	1.20234	0.083692
5011.87	0.060154	3.4892		3.7	1.22074	0.0821387
5011.87	0.0576593	3.52154		3.7	1.23913	0.0806371
5011.87	0.0552681	3.55368		3.7	1.25753	0.0791851
5011.87	0.0529761	3.58562		3.7	1.27592	0.0777808
5011.87	0.0507792	3.61734		3.7	1.29431	0.0764226
5011.87	0.0486733	3.64884		3.7	1.31271	0.0751087
5011.87	0.0466548	3.68012		3.7	1.3311	0.0738375
5011.87	0.04472	3.71116		3.7	1.3495	0.0726074
5011.87	0.0428654	3.74196		3.7	1.36789	0.0714171
5011.87	0.0410878	3.77251		3.7	1.38629	0.0702651
5011.87	0.0393838	3.8028		3.7	1.40468	0.0691502
5011.87	0.0377505	3.83283		3.7	1.42308	0.068071
5011.87	0.036185	3.86258		3.7	1.44147	0.0670263
5011.87	0.0346844	3.89205		3.7	1.45987	0.066015
5011.87	0.033246	3.92124		3.7	1.47826	0.0650361
5011.87	0.0318672	3.95012		3.7	1.49666	0.0640883
5011.87	0.0305457	3.97871		3.7	1.51505	0.0631707
5011.87	0.0292789	4.00698		3.7	1.53344	0.0622824
5011.87	0.0280647	4.03493		3.7	1.55184	0.0614225
5011.87	0.0269008	4.06256		3.7	1.57023	0.0605899
5011.87	0.0257852	4.08985		3.7	1.58863	0.0597839
5011.87	0.0247159	4.11681		3.7	1.60702	0.0590037
5011.87	0.0236909	4.14341		3.7	1.62542	0.0582484
5011.87	0.0227084	4.16966		3.7	1.64381	0.0575173
5011.87	0.0217667	4.19555		3.7	1.66221	0.0568096
5011.87	0.020864	4.22107		3.7	1.6806	0.0561247
5011.87	0.0199988	4.24622		3.7	1.699	0.0554619
5011.87	0.0191694	4.27099		3.7	1.71739	0.0548204
5011.87	0.0183744	4.29538		3.7	1.73579	0.0541998
5011.87	0.0176124	4.31937		3.7	1.75418	0.0535992
5011.87	0.016882	4.34297		3.7	1.77258	0.0530183
5011.87	0.0161819	4.36618		3.7	1.79097	0.0524563
5011.87	0.0155108	4.38898		3.7	1.80936	0.0519127
5011.87	0.0148676	4.41137		3.7	1.82776	0.051387
5011.87	0.014251	4.43335		3.7	1.84615	0.0508787
5011.87	0.01366	4.45492		3.7	1.86455	0.0503872
5011.87	0.0130935	4.47608		3.7	1.88294	0.049912
5011.87	0.0125505	4.49681		3.7	1.90134	0.0494528
5011.87	0.0120301	4.51713		3.7	1.91973	0.0490089
5011.87	0.0115312	4.53703		3.7	1.93813	0.0485799
5011.87	0.011053	4.55651		3.7	1.95652	0.0481655
5011.87	0.0105946	4.57556		3.7	1.97492	0.0477652
5011.87	0.0101552	4.5942		3.7	1.99331	0.0473785
5011.87	0.00973407	4.61241		3.7	2.01171	0.047005
5011.87	0.00933039	4.6302		3.7	2.0301	0.0466444
5011.87	0.00894345	4.64758		3.7	2.04849	0.0462963
5011.87	0.00857256	4.66454		3.7	2.06689	0.0459602
5011.87	0.00821705	4.68109		3.7	2.08528	0.0456359
5011.87	0.00787628	4.69722		3.7	2.10368	0.0453229
5011.87	0.00754964	4.71295		3.7	2.12207	0.0450209
5011.87	0.00723655	4.72827		3.7	2.14047	0.0447296
5011.87	0.00693645	4.74319		3.7	2.15886	0.0444487
5011.87	0.00664879	4.75771		3.7	2.17726	0.0441777
5011.87	0.00637306	4.77184		3.7	2.19565	0.0439165
5011.87	0.00610876	4.78559		3.7	2.21405	0.0436646
5011.87	0.00585543	4.79894		3.7	2.23244	0.0434219
5011.87	0.0056126	4.81193		3.7	2.25084	0.0431879
5011.87	0.00537984	4.82454		3.7	2.26923	0.0429624
5011.87	0.00515673	4.83678		3.7	2.28763	0.0427452
5011.87	0.00494288	4.84866		3.7	2.30602	0.042536
5011.87	0.00473789	4.86019		3.7	2.32441	0.0423344
5011.87	0.00454141	4.87137		3.7	2.34281	0.0421403
5011.87	0.00435307	4.88221		3.7	2.3612	0.0419535
5011.87	0.00417255	4.89271		3.7	2.3796	0.0417735
5011.87	0.00399951	4.90289		3.7	2.39799	0.0416003
5011.87	0.00383365	4.91274		3.7	2.41639	0.0414336
5011.87	0.00367466	4.92228		3.7	2.43478	0.0412731
5011.87	0.00352227	4.93151		3.7	2.45318	0.0411188
5011.87	0.0033762	4.94044		3.7	2.47157	0.0409702
5011.87	0.00323619	4.94908		3.7	2.48997	0.0408273
5011.87	0.00310198	4.95743		3.7	2.50836	0.0406899
5011.87	0.00297334	4.96551		3.7	2.52676	0.0405577
5011.87	0.00285003	4.97331		3.7	2.54515	0.0404305
5011.87	0.00273184	4.98084		3.7	2.56355	0.0403083
5011.87	0.00261855	4.98812		3.7	2.58194	0.0401907
5011.87	0.00250995	4.99515		3.7	2.60033	0.0400777
5011.87	0.00240586	5.00193		3.7	2.61873	0.0399691
5011.87	0.00230609	5.00848		3.7	2.63712	0.0398647
5011.87	0.00221045	5.01479		3.7	2.65552	0.0397644
5011.87	0.00211879	5.02088		3.7	2.67391	0.039668
5011.87	0.00203092	5.02676		3.7	2.69231	0.0395753
5011.87	0.00194669	5.03242		3.7	2.7107	0.0394863
5011.87	0.00186596	5.03788		3.7	2.7291	0.0394008
5011.87	0.00178858	5.04314		3.7	2.74749	0.0393186
5011.87	0.00171441	5.04821		3.7	2.76589	0.0392397
5011.87	0.00164331	5.05309		3.7	2.78428	0.0391639
5011.87	0.00157516	5.05779		3.7	2.80268	0.0390911
5011.87	0.00150984	5.06232		3.7	2.82107	0.0390212
5011.87	0.00144722	5.06668		3.7	2.83946	0.038954
5011.87	0.0013872	5.07088		3.7	2.85786	0.0388896
5011.87	0.00132968	5.07492		3.7	2.87625	0.0388277
5011.87	0.00127453	5.07881		3.7	2.89465	0.0387683
5011.87	0.00122168	5.08255		3.7	2.91304	0.0387112
5011.87	0.00117101	5.08615		3.7	2.93144	0.0386564
5011.87	0.00112245	5.08961		3.7	2.94983	0.0386039
5011.87	0.0010759	5.09294		3.7	2.96823	0.0385534
5011.87	0.00103128	5.09614		3.7	2.98662	0.038505
5011.87	0.000988515	5.09922		3.7	3.00502	0.0384585
5011.87	0.000947521	5.10218		3.7	3.02341	0.0384139
5011.87	0.000908226	5.10503		3.7	3.04181	0.0383711
5011.87	0.000870561	5.10776		3.7	3.0602	0.03833
5011.87	0.000834458	5.11039		3.7	3.0786	0.0382906
5011.87	0.000799853	5.11292		3.7	3.09699	0.0382527
5011.87	0.000766682	5.11534		3.7	3.11538	0.0382164
5011.87	0.000734887	5.11768		3.7	3.13378	0.0381816
5011.87	0.000704411	5.11992		3.7	3.15217	0.0381482
5011.87	0.000675198	5.12207		3.7	3.17057	0.0381162
5011.87	0.000647197	5.12414		3.7	3.18896	0.0380854
5011.87	0.000620358	5.12612		3.7	3.20736	0.0380559
5011.87	0.000594631	5.12803		3.7	3.22575	0.0380276
5011.87	0.000569971	5.12986		3.7	3.24415	0.0380005
5011.87	0.000546334	5.13162		3.7	3.26254	0.0379744
5011.87	0.000523677	5.13331		3.7	3.28094	0.0379494
5011.87	0.00050196	5.13493		3.7	3.29933	0.0379255
5011.87	0.000481143	5.13649		3.7	3.31773	0.0379025
5011.87	0.00046119	5.13798		3.7	3.33612	0.0378805
5011.87	0.000442064	5.13941		3.7	3.35452	0.0378593
5011.87	0.000423731	5.14079		3.7	3.37291	0.037839
5011.87	0.000406159	5.14211		3.7	3.3913	0.0378196
5011.87	0.000389315	5.14338		3.7	3.4097	0.037801
5011.87	0.00037317	5.1446		3.7	3.42809	0.0377831
5011.87	0.000357694	5.14577		3.7	3.44649	0.0377659
5011.87	0.00034286	5.14689		3.7	3.46488	0.0377495
5011.87	0.000328642	5.14796		3.7	3.48328	0.0377337
5011.87	0.000315012	5.14899		3.7	3.50167	0.0377186
5011.87	0.000301949	5.14998		3.7	3.52007	0.0377041
5011.87	0.000289427	5.15093		3.7	3.53846	0.0376902
5011.87	0.000277424	5.15185		3.7	3.55686	0.0376768
5011.87	0.000265919	5.15272		3.7	3.57525	0.037664
5011.87	0.000254891	5.15356		3.7	3.59365	0.0376518
5011.87	0.00024432	5.15436		3.7	3.61204	0.03764
5011.87	0.000234188	5.15513		3.7	3.63043	0.0376288
5011.87	0.000224476	5.15588		3.7	3.64883	0.037618
5011.87	0.000215167	5.15659		3.7	3.66722	0.0376076
5011.87	0.000206244	5.15727		3.7	3.68562	0.0375977
5011.87	0.000197691	5.15792		3.7	3.70401	0.0375881
5011.87	0.000189492	5.15855		3.7	3.72241	0.037579
5011.87	0.000181634	5.15915		3.7	3.7408	0.0375702
5011.87	0.000174102	5.15973		3.7	3.7592	0.0375618
5011.87	0.000166881	5.16028		3.7	3.77759	0.0375538
5011.87	0.000159961	5.16081		3.7	3.79599	0.0375461
5011.87	0.000153327	5.16132		3.7	3.81438	0.0375387
5011.87	0.000146968	5.1618		3.7	3.83278	0.0375316
5011.87	0.000140874	5.16227		3.7	3.85117	0.0375248
5011.87	0.000135031	5.16272		3.7	3.86957	0.0375183
5011.87	0.000129432	5.16315		3.7	3.88796	0.037512
5011.87	0.000124064	5.16356		3.7	3.90635	0.037506
5011.87	0.000118919	5.16396		3.7	3.92475	0.0375003
5011.87	0.000113987	5.16434		3.7	3.94314	0.0374948
5011.87	0.00010926	5.1647		3.7	3.96154	0.0374895
5011.87	0.000104729	5.16505		3.7	3.97993	0.0374844
5011.87	0.000100386	5.16538		3.7	3.99833	0.0374796
5011.87	9.62227e-05	5.16571		3.7	4.01672	0.0374749
5011.87	9.22323e-05	5.16601		3.7	4.03512	0.0374705
5011.87	8.84073e-05	5.16631		3.7	4.05351	0.0374662
5011.87	8.4741e-05	5.16659		3.7	4.07191	0.0374621
5011.87	8.12267e-05	5.16686		3.7	4.0903	0.0374582
5011.87	7.78582e-05	5.16712		3.7	4.1087	0.0374544
5011.87	7.46294e-05	5.16737		3.7	4.12709	0.0374508
5011.87	7.15344e-05	5.16761		3.7	4.14548	0.0374473
5011.87	6.85678e-05	5.16784		3.7	4.16388	0.037444
5011.87	6.57243e-05	5.16806		3.7	4.18227	0.0374408
5011.87	6.29986e-05	5.16827		3.7	4.20067	0.0374378
5011.87	6.0386e-05	5.16847		3.7	4.21906	0.0374349
5011.87	5.78818e-05	5.16866		3.7	4.23746	0.0374321
5011.87	5.54814e-05	5.16885		3.7	4.25585	0.0374294
5011.87	5.31805e-05	5.16903		3.7	4.27425	0.0374268
5011.87	5.09751e-05	5.1692		3.7	4.29264	0.0374243
5011.87	4.88611e-05	5.16936		3.7	4.31104	0.037422
5011.87	4.68348e-05	5.16952		3.7	4.32943	0.0374197
5011.87	4.48925e-05	5.16967		3.7	4.34783	0.0374175
5011.87	4.30308e-05	5.16981		3.7	4.36622	0.0374154
5011.87	4.12463e-05	5.16995		3.7	4.38462	0.0374134
5011.87	3.95357e-05	5.17008		3.7	4.40301	0.0374115
5011.87	3.78962e-05	5.17021		3.7	4.4214	0.0374097
5011.87	3.63246e-05	5.17033		3.7	4.4398	0.0374079
5011.87	3.48182e-05	5.17045		3.7	4.45819	0.0374062
5011.87	3.33742e-05	5.17056		3.7	4.47659	0.0374046
5011.87	3.19902e-05	5.17066		3.7	4.49498	0.0374031
5011.87	3.06635e-05	5.17077		3.7	4.51338	0.0374016
5011.87	2.93919e-05	5.17087		3.7	4.53177	0.0374002
5011.87	2.8173e-05	5.17096		3.7	4.55017	0.0373988
5011.87	2.70046e-05	5.17105		3.7	4.56856	0.0373975
5011.87	2.58847e-05	5.17114		3.7	4.58696	0.0373962
5011.87	2.48113e-05	5.17122		3.7	4.60535	0.037395
5011.87	2.37823e-05	5.1713		3.7	4.62375	0.0373939
5011.87	2.2796e-05	5.17138		3.7	4.64214	0.0373928
5011.87	2.18507e-05	5.17145		3.7	4.66054	0.0373917
5011.87	2.09445e-05	5.17152		3.7	4.67893	0.0373907
5011.87	2.00759e-05	5.17159		3.7	4.69732	0.0373897
5011.87	1.92434e-05	5.17165		3.7	4.71572	0.0373888
5011.87	1.84453e-05	5.17171		3.7	4.73411	0.0373879
5011.87	1.76804e-05	5.17177		3.7	4.75251	0.037387
5011.87	1.69472e-05	5.17183		3.7	4.7709	0.0373862
5011.87	1.62444e-05	5.17188		3.7	4.7893	0.0373854
5011.87	1.55707e-05	5.17194		3.7	4.80769	0.0373847
5011.87	1.4925e-05	5.17199		3.7	4.82609	0.037384
5011.87	1.4306e-05	5.17203		3.7	4.84448	0.0373833
5011.87	1.37127e-05	5.17208		3.7	4.86288	0.0373826
5011.87	1.3144e-05	5.17212		3.7	4.88127	0.037382
5011.87	1.2599e-05	5.17217		3.7	4.89967	0.0373814
5011.87	1.20765e-05	5.17221		3.7	4.91806	0.0373808
5011.87	1.15756e-05	5.17225		3.7	4.93645	0.0373802
5011.87	1.10956e-05	5.17228		3.7	4.95485	0.0373797
5011.87	1.06354e-05	5.17232		3.7	4.97324	0.0373792
5011.87	1.01944e-05	5.17235		3.7	4.99164	0.0373787
5011.87	9.77162e-06	5.17239		3.7	5.01003	0.0373782
5011.87	9.36638e-06	5.17242		3.7	5.02843	0.0373777
5011.87	8.97795e-06	5.17245		3.7	5.04682	0.0373773
5011.87	8.60563e-06	5.17248		3.7	5.06522	0.0373769
5011.87	8.24875e-06	5.1725		3.7	5.08361	0.0373765
5011.87	7.90666e-06	5.17253		3.7	5.10201	0.0373761
5011.87	7.57877e-06	5.17256		3.7	5.1204	0.0373757
5011.87	7.26447e-06	5.17258		3.7	5.1388	0.0373754
5011.87	6.96321e-06	5.1726		3.7	5.15719	0.037375
5011.87	6.67444e-06	5.17263		3.7	5.17559	0.0373747
5011.87	6.39764e-06	5.17265		3.7	5.19398	0.0373744
5011.87	6.13233e-06	5.17267		3.7	5.21237	0.0373741
5011.87	5.87802e-06	5.17269		3.7	5.23077	0.0373738
5011.87	5.63425e-06	5.17271		3.7	5.24916	0.0373735
5011.87	5.40059e-06	5.17272		3.7	5.26756	0.0373733
5011.87	5.17663e-06	5.17274		3.7	5.28595	0.037373
5011.87	4.96195e-06	5.17276		3.7	5.30435	0.0373728
5011.87	4.75617e-06	5.17277		3.7	5.32274	0.0373726
5011.87	4.55893e-06	5.17279		3.7	5.34114	0.0373723
5011.87	4.36987e-06	5.1728		3.7	5.35953	0.0373721
5011.87	4.18865e-06	5.17282		3.7	5.37793	0.0373719
5011.87	4.01494e-06	5.17283		3.7	5.39632	0.0373717
5011.87	3.84844e-06	5.17284		3.7	5.41472	0.0373715
5011.87	3.68884e-06	5.17286		3.7	5.43311	0.0373714
5011.87	3.53586e-06	5.17287		3.7	5.45151	0.0373712
5011.87	3.38922e-06	5.17288		3.7	5.4699	0.037371
5011.87	3.24867e-06	5.17289		3.7	5.48829	0.0373709
5011.87	3.11395e-06	5.1729		3.7	5.50669	0.0373707
5011.87	2.98481e-06	5.17291		3.7	5.52508	0.0373706
5011.87	2.86103e-06	5.17292		3.7	5.54348	0.0373704
5011.87	2.74238e-06	5.17293		3.7	5.56187	0.0373703
5011.87	2.62865e-06	5.17294		3.7	5.58027	0.0373702
5011.87	2.51964e-06	5.17295		3.7	5.59866	0.0373701
5011.87	2.41514e-06	5.17296		3.7	5.61706	0.0373699
5011.87	2.31499e-06	5.17296		3.7	5.63545	0.0373698
5011.87	2.21898e-06	5.17297		3.7	5.65385	0.0373697
5011.87	2.12696e-06	5.17298		3.7	5.67224	0.0373696
5011.87	2.03875e-06	5.17299		3.7	5.69064	0.0373695
5011.87	1.9542e-06	5.17299		3.7	5.70903	0.0373694
5011.87	1.87316e-06	5.173		3.7	5.72742	0.0373693
5011.87	1.79548e-06	5.173		3.7	5.74582	0.0373692
5011.87	1.72102e-06	5.17301		3.7	5.76421	0.0373692
5011.87	1.64965e-06	5.17302		3.7	5.78261	0.0373691
5011.87	1.58124e-06	5.17302		3.7	5.801	0.037369
5011.87	1.51566e-06	5.17303		3.7	5.8194	0.0373689
5011.87	1.45281e-06	5.17303		3.7	5.83779	0.0373689
5011.87	1.39256e-06	5.17304		3.7	5.85619	0.0373688
5011.87	1.33481e-06	5.17304		3.7	5.87458	0.0373687
5011.87	1.27945e-06	5.17304		3.7	5.89298	0.0373687
5011.87	1.22639e-06	5.17305		3.7	5.91137	0.0373686
5011.87	1.17553e-06	5.17305		3.7	5.92977	0.0373686
5011.87	1.12678e-06	5.17306		3.7	5.94816	0.0373685
5011.87	1.08005e-06	5.17306		3.7	5.96656	0.0373684
5011.87	1.03526e-06	5.17306		3.7	5.98495	0.0373684
5011.87	9.92329e-07	5.17307		3.7	6.00334	0.0373683
5011.87	9.51176e-07	5.17307		3.7	6.02174	0.0373683
5011.87	9.1173e-07	5.17307		3.7	6.04013	0.0373683
5011.87	8.7392e-07	5.17308		3.7	6.05853	0.0373682
5011.87	8.37678e-07	5.17308		3.7	6.07692	0.0373682
5011.87	8.02938e-07	5.17308		3.7	6.09532	0.0373681
5011.87	7.6964e-07	5.17308		3.7	6.11371	0.0373681
5011.87	7.37722e-07	5.17309		3.7	6.13211	0.0373681
5011.87	7.07128e-07	5.17309		3.7	6.1505	0.037368
5011.87	6.77803e-07	5.17309		3.7	6.1689	0.037368
5011.87	6.49694e-07	5.17309		3.7	6.18729	0.037368
5011.87	6.22751e-07	5.1731		3.7	6.20569	0.0373679
5011.87	5.96925e-07	5.1731		3.7	6.22408	0.0373679
5011.87	5.7217e-07	5.1731		3.7	6.24247	0.0373679
5011.87	5.48442e-07	5.1731		3.7	6.26087	0.0373678
5011.87	5.25697e-07	5.1731		3.7	6.27926	0.0373678
5011.87	5.03896e-07	5.1731		3.7	6.29766	0.0373678
5011.87	4.82999e-07	5.17311		3.7	6.31605	0.0373678
5011.87	4.62969e-07	5.17311		3.7	6.33445	0.0373678
5011.87	4.43769e-07	5.17311		3.7	6.35284	0.0373677
5011.87	4.25366e-07	5.17311		3.7	6.37124	0.0373677
5011.87	4.07726e-07	5.17311		3.7	6.38963	0.0373677
5011.87	3.90817e-07	5.17311		3.7	6.40803	0.0373677
5011.87	3.74609e-07	5.17311		3.7	6.42642	0.0373677
5011.87	3.59074e-07	5.17312		3.7	6.44482	0.0373676
5011.87	3.44183e-07	5.17312		3.7	6.46321	0.0373676
5011.87	3.29909e-07	5.17312		3.7	6.48161	0.0373676
5011.87	3.16228e-07	5.17312		3.7	6.5	0.0373676
5180.61	0.1	3.08958		3.71438	1	0.104761
5180.61	0.0958529	3.12387		3.71438	1.01839	0.102474
5180.61	0.0918778	3.15805		3.71438	1.03679	0.100268
5180.61	0.0880676	3.19209		3.71438	1.05518	0.0981407
5180.61	0.0844153	3.22601		3.71438	1.07358	0.0960881
5180.61	0.0809146	3.25978		3.71438	1.09197	0.0941072
5180.61	0.077559	3.29342		3.71438	1.11037	0.0921949
5180.61	0.0743426	3.3269		3.71438	1.12876	0.0903483
5180.61	0.0712595	3.36023		3.71438	1.14716	0.0885648
5180.61	0.0683043	3.3934		3.71438	1.16555	0.0868418
5180.61	0.0654717	3.42641		3.71438	1.18395	0.0851769
5180.61	0.0627565	3.45924		3.71438	1.20234	0.0835678
5180.61	0.060154	3.49189		3.71438	1.22074	0.0820124
5180.61	0.0576593	3.52435		3.71438	1.23913	0.0805084
5180.61	0.0552681	3.55662		3.71438	1.25753	0.0790541
5180.61	0.0529761	3.58869		3.71438	1.27592	0.0776475
5180.61	0.0507792	3.62056		3.71438	1.29431	0.0762868
5180.61	0.0486733	3.6522		3.71438	1.31271	0.0749704
5180.61	0.0466548	3.68363		3.71438	1.3311	0.0736967
5180.61	0.04472	3.71483		3.71438	1.3495	0.0724641
5180.61	0.0428654	3.74579		3.71438	1.36789	0.0712712
5180.61	0.0410878	3.7765		3.71438	1.38629	0.0701166
5180.61	0.0393838	3.80696		3.71438	1.40468	0.068999
5180.61	0.0377505	3.83717		3.71438	1.42308	0.0679171
5180.61	0.036185	3.8671		3.71438	1.44147	0.0668697
5180.61	0.0346844	3.89676		3.71438	1.45987	0.0658556
5180.61	0.033246	3.92614		3.71438	1.47826	0.0648738
5180.61	0.0318672	3.95522		3.71438	1.49666	0.0639232
5180.61	0.0305457	3.98401		3.71438	1.51505	0.0630028
5180.61	0.0292789	4.01249		3.71438	1.53344	0.0621116
5180.61	0.0280647	4.04065		3.71438	1.55184	0.0612487
5180.61	0.0269008	4.0685		3.71438	1.57023	0.0604132
5180.61	0.0257852	4.09601		3.71438	1.58863	0.0596042
5180.61	0.0247159	4.1232		3.71438	1.60702	0.058821
5180.61	0.0236909	4.15003		3.71438	1.62542	0.0580627
5180.61	0.0227084	4.17652		3.71438	1.64381	0.0573285
5180.61	0.0217667	4.20265		3.71438	1.66221	0.0566178
5180.61	0.020864	4.22842		3.71438	1.6806	0.0559299
5180.61	0.0199988	4.25382		3.71438	1.699	0.055264
5180.61	0.0191694	4.27884		3.71438	1.71739	0.0546194
5180.61	0.0183744	4.30349		3.71438	1.73579	0.0539957
5180.61	0.0176124	4.32774		3.71438	1.75418	0.0533921
5180.61	0.016882	4.35161		3.71438	1.77258	0.052808
5180.61	0.0161819	4.37508		3.71438	1.79097	0.052243
5180.61	0.0155108	4.39815		3.71438	1.80936	0.0516963
5180.61	0.0148676	4.42082		3.71438	1.82776	0.0511676
5180.61	0.014251	4.44308		3.71438	1.84615	0.0506562
5180.61	0.01366	4.46492		3.71438	1.86455	0.0501616
5180.61	0.0130935	4.48636		3.71438	1.88294	0.0496835
5180.61	0.0125505	4.50738		3.71438	1.90134	0.0492212
5180.61	0.0120301	4.52798		3.71438	1.91973	0.0487743
5180.61	0.0115312	4.54816		3.71438	1.93813	0.0483424
5180.61	0.011053	4.56792		3.71438	1.95652	0.0479251
5180.61	0.0105946	4.58726		3.71438	1.97492	0.0475218
5180.61	0.0101552	4.60618		3.71438	1.99331	0.0471323
5180.61	0.00973407	4.62468		3.71438	2.01171	0.046756
5180.61	0.00933039	4.64276		3.71438	2.0301	0.0463925
5180.61	0.00894345	4.66042		3.71438	2.04849	0.0460416
5180.61	0.00857256	4.67766		3.71438	2.06689	0.0457028
5180.61	0.00821705	4.69448		3.71438	2.08528	0.0453758
5180.61	0.00787628	4.7109		3.71438	2.10368	0.0450602
5180.61	0.00754964	4.7269		3.71438	2.12207	0.0447556
5180.61	0.00723655	4.7425		3.71438	2.14047	0.0444617
5180.61	0.00693645	4.75769		3.71438	2.15886	0.0441782
5180.61	0.00664879	4.77248		3.71438	2.17726	0.0439048
5180.61	0.00637306	4.78688		3.71438	2.19565	0.0436411
5180.61	0.00610876	4.80088		3.71438	2.21405	0.0433869
5180.61	0.00585543	4.8145		3.71438	2.23244	0.0431417
5180.61	0.0056126	4.82774		3.71438	2.25084	0.0429055
5180.61	0.00537984	4.8406		3.71438	2.26923	0.0426778
5180.61	0.00515673	4.85309		3.71438	2.28763	0.0424584
5180.61	0.00494288	4.86522		3.71438	2.30602	0.042247
5180.61	0.00473789	4.87699		3.71438	2.32441	0.0420433
5180.61	0.00454141	4.8884		3.71438	2.34281	0.0418472
5180.61	0.00435307	4.89947		3.71438	2.3612	0.0416583
5180.61	0.00417255	4.9102		3.71438	2.3796	0.0414764
5180.61	0.00399951	4.9206		3.71438	2.39799	0.0413013
5180.61	0.00383365	4.93067		3.71438	2.41639	0.0411327
5180.61	0.00367466	4.94043		3.71438	2.43478	0.0409705
5180.61	0.00352227	4.94987		3.71438	2.45318	0.0408144
5180.61	0.0033762	4.959		3.71438	2.47157	0.0406641
5180.61	0.00323619	4.96784		3.71438	2.48997	0.0405196
5180.61	0.00310198	4.97639		3.71438	2.50836	0.0403805
5180.61	0.00297334	4.98465		3.71438	2.52676	0.0402467
5180.61	0.00285003	4.99264		3.71438	2.54515	0.0401181
5180.61	0.00273184	5.00035		3.71438	2.56355	0.0399944
5180.61	0.00261855	5.00781		3.71438	2.58194	0.0398754
5180.61	0.00250995	5.015		3.71438	2.60033	0.039761
5180.61	0.00240586	5.02195		3.71438	2.61873	0.0396511
5180.61	0.00230609	5.02866		3.71438	2.63712	0.0395454
5180.61	0.00221045	5.03513		3.71438	2.65552	0.0394438
5180.61	0.00211879	5.04137		3.71438	2.67391	0.0393462
5180.61	0.00203092	5.04739		3.71438	2.69231	0.0392523
5180.61	0.00194669	5.0532		3.71438	2.7107	0.0391622
5180.61	0.00186596	5.0588		3.71438	2.7291	0.0390756
5180.61	0.00178858	5.06419		3.71438	2.74749	0.0389923
5180.61	0.00171441	5.06939		3.71438	2.76589	0.0389124
5180.61	0.00164331	5.0744		3.71438	2.78428	0.0388356
5180.61	0.00157516	5.07923		3.71438	2.80268	0.0387619
5180.61	0.00150984	5.08388		3.71438	2.82107	0.038691
5180.61	0.00144722	5.08835		3.71438	2.83946	0.038623
5180.61	0.0013872	5.09266		3.71438	2.85786	0.0385577
5180.61	0.00132968	5.09681		3.71438	2.87625	0.038495
5180.61	0.00127453	5.1008		3.71438	2.89465	0.0384347
5180.61	0.00122168	5.10464		3.71438	2.91304	0.0383769
5180.61	0.00117101	5.10833		3.71438	2.93144	0.0383214
5180.61	0.00112245	5.11189		3.71438	2.94983	0.0382681
5180.61	0.0010759	5.11531		3.71438	2.96823	0.038217
5180.61	0.00103128	5.1186		3.71438	2.98662	0.0381679
5180.61	0.000988515	5.12176		3.71438	3.00502	0.0381208
5180.61	0.000947521	5.1248		3.71438	3.02341	0.0380755
5180.61	0.000908226	5.12773		3.71438	3.04181	0.0380321
5180.61	0.000870561	5.13054		3.71438	3.0602	0.0379905
5180.61	0.000834458	5.13324		3.71438	3.0786	0.0379505
5180.61	0.000799853	5.13583		3.71438	3.09699	0.0379121
5180.61	0.000766682	5.13833		3.71438	3.11538	0.0378753
5180.61	0.000734887	5.14072		3.71438	3.13378	0.03784
5180.61	0.000704411	5.14303		3.71438	3.15217	0.0378061
5180.61	0.000675198	5.14524		3.71438	3.17057	0.0377736
5180.61	0.000647197	5.14737		3.71438	3.18896	0.0377424
5180.61	0.000620358	5.14941		3.71438	3.20736	0.0377125
5180.61	0.000594631	5.15137		3.71438	3.22575	0.0376838
5180.61	0.000569971	5.15325		3.71438	3.24415	0.0376563
5180.61	0.000546334	5.15506		3.71438	3.26254	0.0376299
5180.61	0.000523677	5.15679		3.71438	3.28094	0.0376045
5180.61	0.00050196	5.15846		3.71438	3.29933	0.0375802
5180.61	0.000481143	5.16006		3.71438	3.31773	0.0375569
5180.61	0.00046119	5.1616		3.71438	3.33612	0.0375346
5180.61	0.000442064	5.16307		3.71438	3.35452	0.0375131
5180.61	0.000423731	5.16449		3.71438	3.37291	0.0374926
5180.61	0.000406159	5.16585		3.71438	3.3913	0.0374729
5180.61	0.000389315	5.16715		3.71438	3.4097	0.0374539
5180.61	0.00037317	5.1684		3.71438	3.42809	0.0374358
5180.61	0.000357694	5.16961		3.71438	3.44649	0.0374184
5180.61	0.00034286	5.17076		3.71438	3.46488	0.0374017
5180.61	0.000328642	5.17186		3.71438	3.48328	0.0373857
5180.61	0.000315012	5.17293		3.71438	3.50167	0.0373704
5180.61	0.000301949	5.17395		3.71438	3.52007	0.0373557
5180.61	0.000289427	5.17492		3.71438	3.53846	0.0373415
5180.61	0.000277424	5.17586		3.71438	3.55686	0.037328
5180.61	0.000265919	5.17676		3.71438	3.57525	0.037315
5180.61	0.000254891	5.17762		3.71438	3.59365	0.0373026
5180.61	0.00024432	5.17845		3.71438	3.61204	0.0372907
5180.61	0.000234188	5.17925		3.71438	3.63043	0.0372792
5180.61	0.000224476	5.18001		3.71438	3.64883	0.0372683
5180.61	0.000215167	5.18074		3.71438	3.66722	0.0372578
5180.61	0.000206244	5.18144		3.71438	3.68562	0.0372477
5180.61	0.000197691	5.18211		3.71438	3.70401	0.037238
5180.61	0.000189492	5.18276		3.71438	3.72241	0.0372287
5180.61	0.000181634	5.18337		3.71438	3.7408	0.0372199
5180.61	0.000174102	5.18397		3.71438	3.7592	0.0372113
5180.61	0.000166881	5.18454		3.71438	3.77759	0.0372032
5180.61	0.000159961	5.18508		3.71438	3.79599	0.0371953
5180.61	0.000153327	5.18561		3.71438	3.81438	0.0371878
5180.61	0.000146968	5.18611		3.71438	3.83278	0.0371806
5180.61	0.000140874	5.18659		3.71438	3.85117	0.0371737
5180.61	0.000135031	5.18705		3.71438	3.86957	0.0371671
5180.61	0.000129432	5.18749		3.71438	3.88796	0.0371608
5180.61	0.000124064	5.18792		3.71438	3.90635	0.0371547
5180.61	0.000118919	5.18833		3.71438	3.92475	0.0371489
5180.61	0.000113987	5.18872		3.71438	3.94314	0.0371433
5180.61	0.00010926	5.18909		3.71438	3.96154	0.0371379
5180.61	0.000104729	5.18945		3.71438	3.97993	0.0371328
5180.61	0.000100386	5.18979		3.71438	3.99833	0.0371279
5180.61	9.62227e-05	5.19012		3.71438	4.01672	0.0371231
5180.61	9.22323e-05	5.19044		3.71438	4.03512	0.0371186
5180.61	8.84073e-05	5.19074		3.71438	4.05351	0.0371143
5180.61	8.4741e-05	5.19103		3.71438	4.07191	0.0371101
5180.61	8.12267e-05	5.19131		3.71438	4.0903	0.0371061
5180.61	7.78582e-05	5.19158		3.71438	4.1087	0.0371023
5180.61	7.46294e-05	5.19184		3.71438	4.12709	0.0370986
5180.61	7.15344e-05	5.19208		3.71438	4.14548	0.0370951
5180.61	6.85678e-05	5.19232		3.71438	4.16388	0.0370918
5180.61	6.57243e-05	5.19254		3.71438	4.18227	0.0370885
5180.61	6.29986e-05	5.19276		3.71438	4.20067	0.0370854
5180.61	6.0386e-05	5.19297		3.71438	4.21906	0.0370825
5180.61	5.78818e-05	5.19317		3.71438	4.23746	0.0370796
5180.61	5.54814e-05	5.19336		3.71438	4.25585	0.0370769
5180.61	5.31805e-05	5.19354		3.71438	4.27425	0.0370743
5180.61	5.09751e-05	5.19372		3.71438	4.29264	0.0370718
5180.61	4.88611e-05	5.19388		3.71438	4.31104	0.0370694
5180.61	4.68348e-05	5.19405		3.71438	4.32943	0.0370671
5180.61	4.48925e-05	5.1942		3.71438	4.34783	0.0370649
5180.61	4.30308e-05	5.19435		3.71438	4.36622	0.0370628
5180.61	4.12463e-05	5.19449		3.71438	4.38462	0.0370607
5180.61	3.95357e-05	5.19463		3.71438	4.40301	0.0370588
5180.61	3.78962e-05	5.19476		3.71438	4.4214	0.0370569
5180.61	3.63246e-05	5.19488		3.71438	4.4398	0.0370552
5180.61	3.48182e-05	5.195		3.71438	4.45819	0.0370534
5180.61	3.33742e-05	5.19512		3.71438	4.47659	0.0370518
5180.61	3.19902e-05	5.19523		3.71438	4.49498	0.0370502
5180.61	3.06635e-05	5.19533		3.71438	4.51338	0.0370487
5180.61	2.93919e-05	5.19543		3.71438	4.53177	0.0370473
5180.61	2.8173e-05	5.19553		3.71438	4.55017	0.0370459
5180.61	2.70046e-05	5.19562		3.71438	4.56856	0.0370446
5180.61	2.58847e-05	5.19571		3.71438	4.58696	0.0370433
5180.61	2.48113e-05	5.1958		3.71438	4.60535	0.0370421
5180.61	2.37823e-05	5.19588		3.71438	4.62375	0.0370409
5180.61	2.2796e-05	5.19596		3.71438	4.64214	0.0370398
5180.61	2.18507e-05	5.19604		3.71438	4.66054	0.0370387
5180.61	2.09445e-05	5.19611		3.71438	4.67893	0.0370377
5180.61	2.00759e-05	5.19618		3.71438	4.69732	0.0370367
5180.61	1.92434e-05	5.19624		3.71438	4.71572	0.0370357
5180.61	1.84453e-05	5.19631		3.71438	4.73411	0.0370348
5180.61	1.76804e-05	5.19637		3.71438	4.75251	0.037034
5180.61	1.69472e-05	5.19643		3.71438	4.7709	0.0370331
5180.61	1.62444e-05	5.19648		3.71438	4.7893	0.0370323
5180.61	1.55707e-05	5.19654		3.71438	4.80769	0.0370316
5180.61	1.4925e-05	5.19659		3.71438	4.82609	0.0370308
5180.61	1.4306e-05	5.19664		3.71438	4.84448	0.0370301
5180.61	1.37127e-05	5.19668		3.71438	4.86288	0.0370294
5180.61	1.3144e-05	5.19673		3.71438	4.88127	0.0370288
5180.61	1.2599e-05	5.19677		3.71438	4.89967	0.0370282
5180.61	1.20765e-05	5.19682		3.71438	4.91806	0.0370276
5180.61	1.15756e-05	5.19686		3.71438	4.93645	0.037027
5180.61	1.10956e-05	5.19689		3.71438	4.95485	0.0370265
5180.61	1.06354e-05	5.19693		3.71438	4.97324	0.037026
5180.61	1.01944e-05	5.19697		3.71438	4.99164	0.0370254
5180.61	9.77162e-06	5.197		3.71438	5.01003	0.037025
5180.61	9.36638e-06	5.19703		3.71438	5.02843	0.0370245
5180.61	8.97795e-06	5.19706		3.71438	5.04682	0.0370241
5180.61	8.60563e-06	5.19709		3.71438	5.06522	0.0370236
5180.61	8.24875e-06	5.19712		3.71438	5.08361	0.0370232
5180.61	7.90666e-06	5.19715		3.71438	5.10201	0.0370228
5180.61	7.57877e-06	5.19717		3.71438	5.1204	0.0370225
5180.61	7.26447e-06	5.1972		3.71438	5.1388	0.0370221
5180.61	6.96321e-06	5.19722		3.71438	5.15719	0.0370218
5180.61	6.67444e-06	5.19725		3.71438	5.17559	0.0370214
5180.61	6.39764e-06	5.19727		3.71438	5.19398	0.0370211
5180.61	6.13233e-06	5.19729		3.71438	5.21237	0.0370208
5180.61	5.87802e-06	5.19731		3.71438	5.23077	0.0370205
5180.61	5.63425e-06	5.19733		3.71438	5.24916	0.0370203
5180.61	5.40059e-06	5.19735		3.71438	5.26756	0.03702
5180.61	5.17663e-06	5.19737		3.71438	5.28595	0.0370197
5180.61	4.96195e-06	5.19738		3.71438	5.30435	0.0370195
5180.61	4.75617e-06	5.1974		3.71438	5.32274	0.0370193
5180.61	4.55893e-06	5.19742		3.71438	5.34114	0.037019
5180.61	4.36987e-06	5.19743		3.71438	5.35953	0.0370188
5180.61	4.18865e-06	5.19744		3.71438	5.37793	0.0370186
5180.61	4.01494e-06	5.19746		3.71438	5.39632	0.0370184
5180.61	3.84844e-06	5.19747		3.71438	5.41472	0.0370182
5180.61	3.68884e-06	5.19748		3.71438	5.43311	0.0370181
5180.61	3.53586e-06	5.1975		3.71438	5.45151	0.0370179
5180.61	3.38922e-06	5.19751		3.71438	5.4699	0.0370177
5180.61	3.24867e-06	5.19752		3.71438	5.48829	0.0370175
5180.61	3.11395e-06	5.19753		3.71438	5.50669	0.0370174
5180.61	2.98481e-06	5.19754		3.71438	5.52508	0.0370172
5180.61	2.86103e-06	5.19755		3.71438	5.54348	0.0370171
5180.61	2.74238e-06	5.19756		3.71438	5.56187	0.037017
5180.61	2.62865e-06	5.19757		3.71438	5.58027	0.0370168
5180.61	2.51964e-06	5.19758		3.71438	5.59866	0.0370167
5180.61	2.41514e-06	5.19759		3.71438	5.61706	0.0370166
5180.61	2.31499e-06	5.19759		3.71438	5.63545	0.0370165
5180.61	2.21898e-06	5.1976		3.71438	5.65385	0.0370164
5180.61	2.12696e-06	5.19761		3.71438	5.67224	0.0370163
5180.61	2.03875e-06	5.19762		3.71438	5.69064	0.0370162
5180.61	1.9542e-06	5.19762		3.71438	5.70903	0.0370161
5180.61	1.87316e-06	5.19763		3.71438	5.72742	0.037016
5180.61	1.79548e-06	5.19764		3.71438	5.74582	0.0370159
5180.61	1.72102e-06	5.19764		3.71438	5.76421	0.0370158
5180.61	1.64965e-06	5.19765		3.71438	5.78261	0.0370157
5180.61	1.58124e-06	5.19765		3.71438	5.801	0.0370157
5180.61	1.51566e-06	5.19766		3.71438	5.8194	0.0370156
5180.61	1.45281e-06	5.19766		3.71438	5.83779	0.0370155
5180.61	1.39256e-06	5.19767		3.71438	5.85619	0.0370154
5180.61	1.33481e-06	5.19767		3.71438	5.87458	0.0370154
5180.61	1.27945e-06	5.19768		3.71438	5.89298	0.0370153
5180.61	1.22639e-06	5.19768		3.71438	5.91137	0.0370152
5180.61	1.17553e-06	5.19769		3.71438	5.92977	0.0370152
5180.61	1.12678e-06	5.19769		3.71438	5.94816	0.0370151
5180.61	1.08005e-06	5.19769		3.71438	5.96656	0.0370151
5180.61	1.03526e-06	5.1977		3.71438	5.98495	0.037015
5180.61	9.92329e-07	5.1977		3.71438	6.00334	0.037015
5180.61	9.51176e-07	5.1977		3.71438	6.02174	0.0370149
5180.61	9.1173e-07	5.19771		3.71438	6.04013	0.0370149
5180.61	8.7392e-07	5.19771		3.71438	6.05853	0.0370148
5180.61	8.37678e-07	5.19771		3.71438	6.07692	0.0370148
5180.61	8.02938e-07	5.19772		3.71438	6.09532	0.0370148
5180.61	7.6964e-07	5.19772		3.71438	6.11371	0.0370147
5180.61	7.37722e-07	5.19772		3.71438	6.13211	0.0370147
5180.61	7.07128e-07	5.19772		3.71438	6.1505	0.0370147
5180.61	6.77803e-07	5.19773		3.71438	6.1689	0.0370146
5180.61	6.49694e-07	5.19773		3.71438	6.18729	0.0370146
5180.61	6.22751e-07	5.19773		3.71438	6.20569	0.0370146
5180.61	5.96925e-07	5.19773		3.71438	6.22408	0.0370145
5180.61	5.7217e-07	5.19773		3.71438	6.24247	0.0370145
5180.61	5.48442e-07	5.19774		3.71438	6.26087	0.0370145
5180.61	5.25697e-07	5.19774		3.71438	6.27926	0.0370145
5180.61	5.03896e-07	5.19774		3.71438	6.29766	0.0370144
5180.61	4.82999e-07	5.19774		3.71438	6.31605	0.0370144
5180.61	4.62969e-07	5.19774		3.71438	6.33445	0.0370144
5180.61	4.43769e-07	5.19774		3.71438	6.35284	0.0370144
5180.61	4.25366e-07	5.19775		3.71438	6.37124	0.0370143
5180.61	4.07726e-07	5.19775		3.71438	6.38963	0.0370143
5180.61	3.90817e-07	5.19775		3.71438	6.40803	0.0370143
5180.61	3.74609e-07	5.19775		3.71438	6.42642	0.0370143
5180.61	3.59074e-07	5.19775		3.71438	6.44482	0.0370143
5180.61	3.44183e-07	5.19775		3.71438	6.46321	0.0370142
5180.61	3.29909e-07	5.19775		3.71438	6.48161	0.0370142
5180.61	3.16228e-07	5.19775		3.71438	6.5	0.0370142
5355.04	0.1	3.09105		3.72876	1	0.104662
5355.04	0.0958529	3.12541		3.72876	1.01839	0.102373
5355.04	0.0918778	3.15966		3.72876	1.03679	0.100165
5355.04	0.0880676	3.19379		3.72876	1.05518	0.0980363
5355.04	0.0844153	3.22779		3.72876	1.07358	0.0959818
5355.04	0.0809146	3.26166		3.72876	1.09197	0.093999
5355.04	0.077559	3.29538		3.72876	1.11037	0.0920848
5355.04	0.0743426	3.32897		3.72876	1.12876	0.0902363
5355.04	0.0712595	3.3624		3.72876	1.14716	0.0884508
5355.04	0.0683043	3.39567		3.72876	1.16555	0.0867257
5355.04	0.0654717	3.42879		3.72876	1.18395	0.0850587
5355.04	0.0627565	3.46173		3.72876	1.20234	0.0834475
5355.04	0.060154	3.4945		3.72876	1.22074	0.0818898
5355.04	0.0576593	3.52709		3.72876	1.23913	0.0803837
5355.04	0.0552681	3.55948		3.72876	1.25753	0.0789271
5355.04	0.0529761	3.59169		3.72876	1.27592	0.0775181
5355.04	0.0507792	3.62369		3.72876	1.29431	0.0761551
5355.04	0.0486733	3.65548		3.72876	1.31271	0.0748363
5355.04	0.0466548	3.68705		3.72876	1.3311	0.0735601
5355.04	0.04472	3.7184		3.72876	1.3495	0.0723251
5355.04	0.0428654	3.74951		3.72876	1.36789	0.0711296
5355.04	0.0410878	3.78039		3.72876	1.38629	0.0699725
5355.04	0.0393838	3.81102		3.72876	1.40468	0.0688522
5355.04	0.0377505	3.84139		3.72876	1.42308	0.0677677
5355.04	0.036185	3.87151		3.72876	1.44147	0.0667176
5355.04	0.0346844	3.90135		3.72876	1.45987	0.0657008
5355.04	0.033246	3.93091		3.72876	1.47826	0.0647162
5355.04	0.0318672	3.96019		3.72876	1.49666	0.0637628
5355.04	0.0305457	3.98918		3.72876	1.51505	0.0628396
5355.04	0.0292789	4.01786		3.72876	1.53344	0.0619456
5355.04	0.0280647	4.04624		3.72876	1.55184	0.0610798
5355.04	0.0269008	4.0743		3.72876	1.57023	0.0602414
5355.04	0.0257852	4.10203		3.72876	1.58863	0.0594295
5355.04	0.0247159	4.12944		3.72876	1.60702	0.0586433
5355.04	0.0236909	4.1565		3.72876	1.62542	0.057882
5355.04	0.0227084	4.18323		3.72876	1.64381	0.0571449
5355.04	0.0217667	4.2096		3.72876	1.66221	0.0564312
5355.04	0.020864	4.23561		3.72876	1.6806	0.0557402
5355.04	0.0199988	4.26126		3.72876	1.699	0.0550713
5355.04	0.0191694	4.28653		3.72876	1.71739	0.0544237
5355.04	0.0183744	4.31143		3.72876	1.73579	0.0537969
5355.04	0.0176124	4.33595		3.72876	1.75418	0.0531903
5355.04	0.016882	4.36008		3.72876	1.77258	0.0526032
5355.04	0.0161819	4.38381		3.72876	1.79097	0.0520351
5355.04	0.0155108	4.40715		3.72876	1.80936	0.0514854
5355.04	0.0148676	4.43009		3.72876	1.82776	0.0509536
5355.04	0.014251	4.45262		3.72876	1.84615	0.0504392
5355.04	0.01366	4.47475		3.72876	1.86455	0.0499416
5355.04	0.0130935	4.49646		3.72876	1.88294	0.0494605
5355.04	0.0125505	4.51776		3.72876	1.90134	0.0489952
5355.04	0.0120301	4.53864		3.72876	1.91973	0.0485454
5355.04	0.0115312	4.55911		3.72876	1.93813	0.0481105
5355.04	0.011053	4.57915		3.72876	1.95652	0.0476902
5355.04	0.0105946	4.59878		3.72876	1.97492	0.0472841
5355.04	0.0101552	4.61798		3.72876	1.99331	0.0468917
5355.04	0.00973407	4.63676		3.72876	2.01171	0.0465125
5355.04	0.00933039	4.65513		3.72876	2.0301	0.0461463
5355.04	0.00894345	4.67307		3.72876	2.04849	0.0457926
5355.04	0.00857256	4.69059		3.72876	2.06689	0.0454511
5355.04	0.00821705	4.7077		3.72876	2.08528	0.0451214
5355.04	0.00787628	4.72439		3.72876	2.10368	0.0448031
5355.04	0.00754964	4.74067		3.72876	2.12207	0.0444959
5355.04	0.00723655	4.75655		3.72876	2.14047	0.0441994
5355.04	0.00693645	4.77201		3.72876	2.15886	0.0439134
5355.04	0.00664879	4.78707		3.72876	2.17726	0.0436375
5355.04	0.00637306	4.80174		3.72876	2.19565	0.0433713
5355.04	0.00610876	4.81601		3.72876	2.21405	0.0431147
5355.04	0.00585543	4.82989		3.72876	2.23244	0.0428672
5355.04	0.0056126	4.84339		3.72876	2.25084	0.0426287
5355.04	0.00537984	4.8565		3.72876	2.26923	0.0423987
5355.04	0.00515673	4.86925		3.72876	2.28763	0.0421771
5355.04	0.00494288	4.88162		3.72876	2.30602	0.0419635
5355.04	0.00473789	4.89363		3.72876	2.32441	0.0417578
5355.04	0.00454141	4.90529		3.72876	2.34281	0.0415596
5355.04	0.00435307	4.91659		3.72876	2.3612	0.0413687
5355.04	0.00417255	4.92755		3.72876	2.3796	0.0411848
5355.04	0.00399951	4.93818		3.72876	2.39799	0.0410078
5355.04	0.00383365	4.94847		3.72876	2.41639	0.0408374
5355.04	0.00367466	4.95844		3.72876	2.43478	0.0406733
5355.04	0.00352227	4.96809		3.72876	2.45318	0.0405154
5355.04	0.0033762	4.97744		3.72876	2.47157	0.0403635
5355.04	0.00323619	4.98648		3.72876	2.48997	0.0402172
5355.04	0.00310198	4.99522		3.72876	2.50836	0.0400766
5355.04	0.00297334	5.00368		3.72876	2.52676	0.0399412
5355.04	0.00285003	5.01185		3.72876	2.54515	0.039811
5355.04	0.00273184	5.01975		3.72876	2.56355	0.0396858
5355.04	0.00261855	5.02738		3.72876	2.58194	0.0395654
5355.04	0.00250995	5.03475		3.72876	2.60033	0.0394497
5355.04	0.00240586	5.04187		3.72876	2.61873	0.0393384
5355.04	0.00230609	5.04874		3.72876	2.63712	0.0392314
5355.04	0.00221045	5.05538		3.72876	2.65552	0.0391285
5355.04	0.00211879	5.06177		3.72876	2.67391	0.0390296
5355.04	0.00203092	5.06795		3.72876	2.69231	0.0389346
5355.04	0.00194669	5.0739		3.72876	2.7107	0.0388433
5355.04	0.00186596	5.07964		3.72876	2.7291	0.0387556
5355.04	0.00178858	5.08517		3.72876	2.74749	0.0386713
5355.04	0.00171441	5.0905		3.72876	2.76589	0.0385903
5355.04	0.00164331	5.09564		3.72876	2.78428	0.0385125
5355.04	0.00157516	5.10059		3.72876	2.80268	0.0384378
5355.04	0.00150984	5.10536		3.72876	2.82107	0.038366
5355.04	0.00144722	5.10995		3.72876	2.83946	0.0382971
5355.04	0.0013872	5.11438		3.72876	2.85786	0.0382309
5355.04	0.00132968	5.11863		3.72876	2.87625	0.0381673
5355.04	0.00127453	5.12273		3.72876	2.89465	0.0381063
5355.04	0.00122168	5.12667		3.72876	2.91304	0.0380477
5355.04	0.00117101	5.13047		3.72876	2.93144	0.0379914
5355.04	0.00112245	5.13412		3.72876	2.94983	0.0379374
5355.04	0.0010759	5.13763		3.72876	2.96823	0.0378856
5355.04	0.00103128	5.14101		3.72876	2.98662	0.0378358
5355.04	0.000988515	5.14426		3.72876	3.00502	0.037788
5355.04	0.000947521	5.14738		3.72876	3.02341	0.0377422
5355.04	0.000908226	5.15039		3.72876	3.04181	0.0376982
5355.04	0.000870561	5.15327		3.72876	3.0602	0.037656
5355.04	0.000834458	5.15605		3.72876	3.0786	0.0376154
5355.04	0.000799853	5.15872		3.72876	3.09699	0.0375765
5355.04	0.000766682	5.16128		3.72876	3.11538	0.0375392
5355.04	0.000734887	5.16374		3.72876	3.13378	0.0375034
5355.04	0.000704411	5.16611		3.72876	3.15217	0.037469
5355.04	0.000675198	5.16839		3.72876	3.17057	0.0374361
5355.04	0.000647197	5.17057		3.72876	3.18896	0.0374044
5355.04	0.000620358	5.17267		3.72876	3.20736	0.0373741
5355.04	0.000594631	5.17468		3.72876	3.22575	0.037345
5355.04	0.000569971	5.17662		3.72876	3.24415	0.0373171
5355.04	0.000546334	5.17848		3.72876	3.26254	0.0372903
5355.04	0.000523677	5.18026		3.72876	3.28094	0.0372646
5355.04	0.00050196	5.18198		3.72876	3.29933	0.0372399
5355.04	0.000481143	5.18362		3.72876	3.31773	0.0372163
5355.04	0.00046119	5.1852		3.72876	3.33612	0.0371936
5355.04	0.000442064	5.18672		3.72876	3.35452	0.0371719
5355.04	0.000423731	5.18818		3.72876	3.37291	0.037151
5355.04	0.000406159	5.18957		3.72876	3.3913	0.037131
5355.04	0.000389315	5.19092		3.72876	3.4097	0.0371118
5355.04	0.00037317	5.1922		3.72876	3.42809	0.0370934
5355.04	0.000357694	5.19344		3.72876	3.44649	0.0370757
5355.04	0.00034286	5.19463		3.72876	3.46488	0.0370588
5355.04	0.000328642	5.19576		3.72876	3.48328	0.0370426
5355.04	0.000315012	5.19686		3.72876	3.50167	0.037027
5355.04	0.000301949	5.1979		3.72876	3.52007	0.0370121
5355.04	0.000289427	5.19891		3.72876	3.53846	0.0369978
5355.04	0.000277424	5.19987		3.72876	3.55686	0.036984
5355.04	0.000265919	5.2008		3.72876	3.57525	0.0369709
5355.04	0.000254891	5.20169		3.72876	3.59365	0.0369583
5355.04	0.00024432	5.20254		3.72876	3.61204	0.0369462
5355.04	0.000234188	5.20336		3.72876	3.63043	0.0369346
5355.04	0.000224476	5.20414		3.72876	3.64883	0.0369234
5355.04	0.000215167	5.20489		3.72876	3.66722	0.0369128
5355.04	0.000206244	5.20561		3.72876	3.68562	0.0369025
5355.04	0.000197691	5.20631		3.72876	3.70401	0.0368927
5355.04	0.000189492	5.20697		3.72876	3.72241	0.0368833
5355.04	0.000181634	5.20761		3.72876	3.7408	0.0368743
5355.04	0.000174102	5.20822		3.72876	3.7592	0.0368657
5355.04	0.000166881	5.2088		3.72876	3.77759	0.0368574
5355.04	0.000159961	5.20936		3.72876	3.79599	0.0368494
5355.04	0.000153327	5.2099		3.72876	3.81438	0.0368418
5355.04	0.000146968	5.21042		3.72876	3.83278	0.0368345
5355.04	0.000140874	5.21091		3.72876	3.85117	0.0368275
5355.04	0.000135031	5.21139		3.72876	3.86957	0.0368208
5355.04	0.000129432	5.21184		3.72876	3.88796	0.0368143
5355.04	0.000124064	5.21228		3.72876	3.90635	0.0368082
5355.04	0.000118919	5.2127		3.72876	3.92475	0.0368023
5355.04	0.000113987	5.2131		3.72876	3.94314	0.0367966
5355.04	0.00010926	5.21349		3.72876	3.96154	0.0367911
5355.04	0.000104729	5.21386		3.72876	3.97993	0.0367859
5355.04	0.000100386	5.21421		3.72876	3.99833	0.0367809
5355.04	9.62227e-05	5.21455		3.72876	4.01672	0.0367761
5355.04	9.22323e-05	5.21488		3.72876	4.03512	0.0367716
5355.04	8.84073e-05	5.21519		3.72876	4.05351	0.0367671
5355.04	8.4741e-05	5.21549		3.72876	4.07191	0.0367629
5355.04	8.12267e-05	5.21577		3.72876	4.0903	0.0367589
5355.04	7.78582e-05	5.21605		3.72876	4.1087	0.036755
5355.04	7.46294e-05	5.21631		3.72876	4.12709	0.0367513
5355.04	7.15344e-05	5.21657		3.72876	4.14548	0.0367477
5355.04	6.85678e-05	5.21681		3.72876	4.16388	0.0367443
5355.04	6.57243e-05	5.21704		3.72876	4.18227	0.036741
5355.04	6.29986e-05	5.21727		3.72876	4.20067	0.0367379
5355.04	6.0386e-05	5.21748		3.72876	4.21906	0.0367349
5355.04	5.78818e-05	5.21768		3.72876	4.23746	0.036732
5355.04	5.54814e-05	5.21788		3.72876	4.25585	0.0367292
5355.04	5.31805e-05	5.21807		3.72876	4.27425	0.0367266
5355.04	5.09751e-05	5.21825		3.72876	4.29264	0.036724
5355.04	4.88611e-05	5.21842		3.72876	4.31104	0.0367216
5355.04	4.68348e-05	5.21859		3.72876	4.32943	0.0367193
5355.04	4.48925e-05	5.21875		3.72876	4.34783	0.036717
5355.04	4.30308e-05	5.2189		3.72876	4.36622	0.0367149
5355.04	4.12463e-05	5.21905		3.72876	4.38462	0.0367128
5355.04	3.95357e-05	5.21919		3.72876	4.40301	0.0367108
5355.04	3.78962e-05	5.21932		3.72876	4.4214	0.036709
5355.04	3.63246e-05	5.21945		3.72876	4.4398	0.0367071
5355.04	3.48182e-05	5.21957		3.72876	4.45819	0.0367054
5355.04	3.33742e-05	5.21969		3.72876	4.47659	0.0367037
5355.04	3.19902e-05	5.21981		3.72876	4.49498	0.0367021
5355.04	3.06635e-05	5.21991		3.72876	4.51338	0.0367006
5355.04	2.93919e-05	5.22002		3.72876	4.53177	0.0366991
5355.04	2.8173e-05	5.22012		3.72876	4.55017	0.0366977
5355.04	2.70046e-05	5.22021		3.72876	4.56856	0.0366964
5355.04	2.58847e-05	5.22031		3.72876	4.58696	0.0366951
5355.04	2.48113e-05	5.22039		3.72876	4.60535	0.0366939
5355.04	2.37823e-05	5.22048		3.72876	4.62375	0.0366927
5355.04	2.2796e-05	5.22056		3.72876	4.64214	0.0366915
5355.04	2.18507e-05	5.22064		3.72876	4.66054	0.0366904
5355.04	2.09445e-05	5.22071		3.72876	4.67893	0.0366894
5355.04	2.00759e-05	5.22078		3.72876	4.69732	0.0366884
5355.04	1.92434e-05	5.22085		3.72876	4.71572	0.0366874
5355.04	1.84453e-05	5.22092		3.72876	4.73411	0.0366865
5355.04	1.76804e-05	5.22098		3.72876	4.75251	0.0366856
5355.04	1.69472e-05	5.22104		3.72876	4.7709	0.0366848
5355.04	1.62444e-05	5.2211		3.72876	4.7893	0.036684
5355.04	1.55707e-05	5.22115		3.72876	4.80769	0.0366832
5355.04	1.4925e-05	5.22121		3.72876	4.82609	0.0366825
5355.04	1.4306e-05	5.22126		3.72876	4.84448	0.0366817
5355.04	1.37127e-05	5.22131		3.72876	4.86288	0.0366811
5355.04	1.3144e-05	5.22135		3.72876	4.88127	0.0366804
5355.04	1.2599e-05	5.2214		3.72876	4.89967	0.0366798
5355.04	1.20765e-05	5.22144		3.72876	4.91806	0.0366792
5355.04	1.15756e-05	5.22148		3.72876	4.93645	0.0366786
5355.04	1.10956e-05	5.22152		3.72876	4.95485	0.036678
5355.04	1.06354e-05	5.22156		3.72876	4.97324	0.0366775
5355.04	1.01944e-05	5.22159		3.72876	4.99164	0.036677
5355.04	9.77162e-06	5.22163		3.72876	5.01003	0.0366765
5355.04	9.36638e-06	5.22166		3.72876	5.02843	0.036676
5355.04	8.97795e-06	5.22169		3.72876	5.04682	0.0366756
5355.04	8.60563e-06	5.22172		3.72876	5.06522	0.0366752
5355.04	8.24875e-06	5.22175		3.72876	5.08361	0.0366748
5355.04	7.90666e-06	5.22178		3.72876	5.10201	0.0366744
5355.04	7.57877e-06	5.22181		3.72876	5.1204	0.036674
5355.04	7.26447e-06	5.22183		3.72876	5.1388	0.0366736
5355.04	6.96321e-06	5.22186		3.72876	5.15719	0.0366733
5355.04	6.67444e-06	5.22188		3.72876	5.17559	0.0366729
5355.04	6.39764e-06	5.22191		3.72876	5.19398	0.0366726
5355.04	6.13233e-06	5.22193		3.72876	5.21237	0.0366723
5355.04	5.87802e-06	5.22195		3.72876	5.23077	0.036672
5355.04	5.63425e-06	5.22197		3.72876	5.24916	0.0366717
5355.04	5.40059e-06	5.22199		3.72876	5.26756	0.0366715
5355.04	5.17663e-06	5.22201		3.72876	5.28595	0.0366712
5355.04	4.96195e-06	5.22202		3.72876	5.30435	0.036671
5355.04	4.75617e-06	5.22204		3.72876	5.32274	0.0366707
5355.04	4.55893e-06	5.22206		3.72876	5.34114	0.0366705
5355.04	4.36987e-06	5.22207		3.72876	5.35953	0.0366703
5355.04	4.18865e-06	5.22209		3.72876	5.37793	0.0366701
5355.04	4.01494e-06	5.2221		3.72876	5.39632	0.0366699
5355.04	3.84844e-06	5.22212		3.72876	5.41472	0.0366697
5355.04	3.68884e-06	5.22213		3.72876	5.43311	0.0366695
5355.04	3.53586e-06	5.22214		3.72876	5.45151	0.0366693
5355.04	3.38922e-06	5.22215		3.72876	5.4699	0.0366691
5355.04	3.24867e-06	5.22216		3.72876	5.48829	0.036669
5355.04	3.11395e-06	5.22218		3.72876	5.50669	0.0366688
5355.04	2.98481e-06	5.22219		3.72876	5.52508	0.0366687
5355.04	2.86103e-06	5.2222		3.72876	5.54348	0.0366685
5355.04	2.74238e-06	5.22221		3.72876	5.56187	0.0366684
5355.04	2.62865e-06	5.22222		3.72876	5.58027	0.0366683
5355.04	2.51964e-06	5.22222		3.72876	5.59866	0.0366681
5355.04	2.41514e-06	5.22223		3.72876	5.61706	0.036668
5355.04	2.31499e-06	5.22224		3.72876	5.63545	0.0366679
5355.04	2.21898e-06	5.22225		3.72876	5.65385	0.0366678
5355.04	2.12696e-06	5.22226		3.72876	5.67224	0.0366677
5355.04	2.03875e-06	5.22226		3.72876	5.69064	0.0366676
5355.04	1.9542e-06	5.22227		3.72876	5.70903	0.0366675
5355.04	1.87316e-06	5.22228		3.72876	5.72742	0.0366674
5355.04	1.79548e-06	5.22228		3.72876	5.74582	0.0366673
5355.04	1.72102e-06	5.22229		3.72876	5.76421	0.0366672
5355.04	1.64965e-06	5.2223		3.72876	5.78261	0.0366671
5355.04	1.58124e-06	5.2223		3.72876	5.801	0.0366671
5355.04	1.51566e-06	5.22231		3.72876	5.8194	0.036667
5355.04	1.45281e-06	5.22231		3.72876	5.83779	0.0366669
5355.04	1.39256e-06	5.22232		3.72876	5.85619	0.0366668
5355.04	1.33481e-06	5.22232		3.72876	5.87458	0.0366668
5355.04	1.27945e-06	5.22233		3.72876	5.89298	0.0366667
5355.04	1.22639e-06	5.22233		3.72876	5.91137	0.0366666
5355.04	1.17553e-06	5.22234		3.72876	5.92977	0.0366666
5355.04	1.12678e-06	5.22234		3.72876	5.94816	0.0366665
5355.04	1.08005e-06	5.22234		3.72876	5.96656	0.0366665
5355.04	1.03526e-06	5.22235		3.72876	5.98495	0.0366664
5355.04	9.92329e-07	5.22235		3.72876	6.00334	0.0366664
5355.04	9.51176e-07	5.22235		3.72876	6.02174	0.0366663
5355.04	9.1173e-07	5.22236		3.72876	6.04013	0.0366663
5355.04	8.7392e-07	5.22236		3.72876	6.05853	0.0366662
5355.04	8.37678e-07	5.22236		3.72876	6.07692	0.0366662
5355.04	8.02938e-07	5.22237		3.72876	6.09532	0.0366662
5355.04	7.6964e-07	5.22237		3.72876	6.11371	0.0366661
5355.04	7.37722e-07	5.22237		3.72876	6.13211	0.0366661
5355.04	7.07128e-07	5.22237		3.72876	6.1505	0.036666
5355.04	6.77803e-07	5.22238		3.72876	6.1689	0.036666
5355.04	6.49694e-07	5.22238		3.72876	6.18729	0.036666
5355.04	6.22751e-07	5.22238		3.72876	6.20569	0.0366659
5355.04	5.96925e-07	5.22238		3.72876	6.22408	0.0366659
5355.04	5.7217e-07	5.22238		3.72876	6.24247	0.0366659
5355.04	5.48442e-07	5.22239		3.72876	6.26087	0.0366659
5355.04	5.25697e-07	5.22239		3.72876	6.27926	0.0366658
5355.04	5.03896e-07	5.22239		3.72876	6.29766	0.0366658
5355.04	4.82999e-07	5.22239		3.72876	6.31605	0.0366658
5355.04	4.62969e-07	5.22239		3.72876	6.33445	0.0366658
5355.04	4.43769e-07	5.2224		3.72876	6.35284	0.0366657
5355.04	4.25366e-07	5.2224		3.72876	6.37124	0.0366657
5355.04	4.07726e-07	5.2224		3.72876	6.38963	0.0366657
5355.04	3.90817e-07	5.2224		3.72876	6.40803	0.0366657
5355.04	3.74609e-07	5.2224		3.72876	6.42642	0.0366657
5355.04	3.59074e-07	5.2224		3.72876	6.44482	0.0366656
5355.04	3.44183e-07	5.2224		3.72876	6.46321	0.0366656
5355.04	3.29909e-07	5.2224		3.72876	6.48161	0.0366656
5355.04	3.16228e-07	5.22241		3.72876	6.5	0.0366656
5535.33	0.1	3.09247		3.74314	1	0.104566
5535.33	0.0958529	3.12691		3.74314	1.01839	0.102275
5535.33	0.0918778	3.16124		3.74314	1.03679	0.100066
5535.33	0.0880676	3.19544		3.74314	1.05518	0.097935
5535.33	0.0844153	3.22952		3.74314	1.07358	0.0958789
5535.33	0.0809146	3.26348		3.74314	1.09197	0.0938942
5535.33	0.077559	3.29729		3.74314	1.11037	0.0919781
5535.33	0.0743426	3.33097		3.74314	1.12876	0.0901277
5535.33	0.0712595	3.3645		3.74314	1.14716	0.0883402
5535.33	0.0683043	3.39788		3.74314	1.16555	0.0866132
5535.33	0.0654717	3.4311		3.74314	1.18395	0.0849442
5535.33	0.0627565	3.46415		3.74314	1.20234	0.0833308
5535.33	0.060154	3.49704		3.74314	1.22074	0.081771
5535.33	0.0576593	3.52974		3.74314	1.23913	0.0802627
5535.33	0.0552681	3.56227		3.74314	1.25753	0.0788039
5535.33	0.0529761	3.5946		3.74314	1.27592	0.0773927
5535.33	0.0507792	3.62673		3.74314	1.29431	0.0760273
5535.33	0.0486733	3.65866		3.74314	1.31271	0.0747062
5535.33	0.0466548	3.69037		3.74314	1.3311	0.0734276
5535.33	0.04472	3.72187		3.74314	1.3495	0.0721901
5535.33	0.0428654	3.75314		3.74314	1.36789	0.0709922
5535.33	0.0410878	3.78417		3.74314	1.38629	0.0698325
5535.33	0.0393838	3.81497		3.74314	1.40468	0.0687097
5535.33	0.0377505	3.84551		3.74314	1.42308	0.0676226
5535.33	0.036185	3.8758		3.74314	1.44147	0.0665699
5535.33	0.0346844	3.90582		3.74314	1.45987	0.0655504
5535.33	0.033246	3.93557		3.74314	1.47826	0.0645632
5535.33	0.0318672	3.96504		3.74314	1.49666	0.063607
5535.33	0.0305457	3.99422		3.74314	1.51505	0.062681
5535.33	0.0292789	4.0231		3.74314	1.53344	0.0617842
5535.33	0.0280647	4.05169		3.74314	1.55184	0.0609156
5535.33	0.0269008	4.07996		3.74314	1.57023	0.0600743
5535.33	0.0257852	4.10791		3.74314	1.58863	0.0592595
5535.33	0.0247159	4.13554		3.74314	1.60702	0.0584704
5535.33	0.0236909	4.16283		3.74314	1.62542	0.0577062
5535.33	0.0227084	4.18978		3.74314	1.64381	0.0569662
5535.33	0.0217667	4.21639		3.74314	1.66221	0.0562495
5535.33	0.020864	4.24264		3.74314	1.6806	0.0555556
5535.33	0.0199988	4.26853		3.74314	1.699	0.0548836
5535.33	0.0191694	4.29406		3.74314	1.71739	0.0542331
5535.33	0.0183744	4.31921		3.74314	1.73579	0.0536033
5535.33	0.0176124	4.34398		3.74314	1.75418	0.0529936
5535.33	0.016882	4.36837		3.74314	1.77258	0.0524035
5535.33	0.0161819	4.39237		3.74314	1.79097	0.0518324
5535.33	0.0155108	4.41598		3.74314	1.80936	0.0512797
5535.33	0.0148676	4.43919		3.74314	1.82776	0.0507449
5535.33	0.014251	4.462		3.74314	1.84615	0.0502275
5535.33	0.01366	4.4844		3.74314	1.86455	0.049727
5535.33	0.0130935	4.50639		3.74314	1.88294	0.0492428
5535.33	0.0125505	4.52797		3.74314	1.90134	0.0487746
5535.33	0.0120301	4.54913		3.74314	1.91973	0.0483218
5535.33	0.0115312	4.56988		3.74314	1.93813	0.0478841
5535.33	0.011053	4.5902		3.74314	1.95652	0.0474609
5535.33	0.0105946	4.61011		3.74314	1.97492	0.0470519
5535.33	0.0101552	4.6296		3.74314	1.99331	0.0466566
5535.33	0.00973407	4.64867		3.74314	2.01171	0.0462746
5535.33	0.00933039	4.66732		3.74314	2.0301	0.0459056
5535.33	0.00894345	4.68554		3.74314	2.04849	0.0455492
5535.33	0.00857256	4.70335		3.74314	2.06689	0.0452049
5535.33	0.00821705	4.72074		3.74314	2.08528	0.0448725
5535.33	0.00787628	4.73771		3.74314	2.10368	0.0445515
5535.33	0.00754964	4.75427		3.74314	2.12207	0.0442417
5535.33	0.00723655	4.77042		3.74314	2.14047	0.0439427
5535.33	0.00693645	4.78616		3.74314	2.15886	0.0436541
5535.33	0.00664879	4.8015		3.74314	2.17726	0.0433757
5535.33	0.00637306	4.81643		3.74314	2.19565	0.0431071
5535.33	0.00610876	4.83097		3.74314	2.21405	0.0428481
5535.33	0.00585543	4.84512		3.74314	2.23244	0.0425982
5535.33	0.0056126	4.85887		3.74314	2.25084	0.0423574
5535.33	0.00537984	4.87225		3.74314	2.26923	0.0421251
5535.33	0.00515673	4.88524		3.74314	2.28763	0.0419013
5535.33	0.00494288	4.89787		3.74314	2.30602	0.0416856
5535.33	0.00473789	4.91013		3.74314	2.32441	0.0414777
5535.33	0.00454141	4.92202		3.74314	2.34281	0.0412774
5535.33	0.00435307	4.93357		3.74314	2.3612	0.0410845
5535.33	0.00417255	4.94476		3.74314	2.3796	0.0408987
5535.33	0.00399951	4.95561		3.74314	2.39799	0.0407197
5535.33	0.00383365	4.96613		3.74314	2.41639	0.0405474
5535.33	0.00367466	4.97632		3.74314	2.43478	0.0403816
5535.33	0.00352227	4.98619		3.74314	2.45318	0.0402219
5535.33	0.0033762	4.99574		3.74314	2.47157	0.0400682
5535.33	0.00323619	5.00499		3.74314	2.48997	0.0399203
5535.33	0.00310198	5.01394		3.74314	2.50836	0.0397779
5535.33	0.00297334	5.02259		3.74314	2.52676	0.039641
5535.33	0.00285003	5.03095		3.74314	2.54515	0.0395093
5535.33	0.00273184	5.03904		3.74314	2.56355	0.0393826
5535.33	0.00261855	5.04685		3.74314	2.58194	0.0392607
5535.33	0.00250995	5.0544		3.74314	2.60033	0.0391436
5535.33	0.00240586	5.06169		3.74314	2.61873	0.0390309
5535.33	0.00230609	5.06873		3.74314	2.63712	0.0389225
5535.33	0.00221045	5.07553		3.74314	2.65552	0.0388184
5535.33	0.00211879	5.08208		3.74314	2.67391	0.0387183
5535.33	0.00203092	5.08841		3.74314	2.69231	0.0386221
5535.33	0.00194669	5.09451		3.74314	2.7107	0.0385296
5535.33	0.00186596	5.1004		3.74314	2.7291	0.0384408
5535.33	0.00178858	5.10607		3.74314	2.74749	0.0383554
5535.33	0.00171441	5.11154		3.74314	2.76589	0.0382733
5535.33	0.00164331	5.11681		3.74314	2.78428	0.0381945
5535.33	0.00157516	5.12189		3.74314	2.80268	0.0381188
5535.33	0.00150984	5.12678		3.74314	2.82107	0.0380461
5535.33	0.00144722	5.13149		3.74314	2.83946	0.0379763
5535.33	0.0013872	5.13603		3.74314	2.85786	0.0379092
5535.33	0.00132968	5.1404		3.74314	2.87625	0.0378448
5535.33	0.00127453	5.14461		3.74314	2.89465	0.0377829
5535.33	0.00122168	5.14866		3.74314	2.91304	0.0377235
5535.33	0.00117101	5.15255		3.74314	2.93144	0.0376665
5535.33	0.00112245	5.1563		3.74314	2.94983	0.0376117
5535.33	0.0010759	5.15991		3.74314	2.96823	0.0375592
5535.33	0.00103128	5.16338		3.74314	2.98662	0.0375087
5535.33	0.000988515	5.16671		3.74314	3.00502	0.0374603
5535.33	0.000947521	5.16992		3.74314	3.02341	0.0374138
5535.33	0.000908226	5.17301		3.74314	3.04181	0.0373692
5535.33	0.000870561	5.17597		3.74314	3.0602	0.0373264
5535.33	0.000834458	5.17883		3.74314	3.0786	0.0372853
5535.33	0.000799853	5.18157		3.74314	3.09699	0.0372458
5535.33	0.000766682	5.1842		3.74314	3.11538	0.037208
5535.33	0.000734887	5.18673		3.74314	3.13378	0.0371717
5535.33	0.000704411	5.18917		3.74314	3.15217	0.0371368
5535.33	0.000675198	5.1915		3.74314	3.17057	0.0371034
5535.33	0.000647197	5.19375		3.74314	3.18896	0.0370713
5535.33	0.000620358	5.19591		3.74314	3.20736	0.0370405
5535.33	0.000594631	5.19798		3.74314	3.22575	0.037011
5535.33	0.000569971	5.19997		3.74314	3.24415	0.0369827
5535.33	0.000546334	5.20188		3.74314	3.26254	0.0369555
5535.33	0.000523677	5.20372		3.74314	3.28094	0.0369294
5535.33	0.00050196	5.20548		3.74314	3.29933	0.0369044
5535.33	0.000481143	5.20717		3.74314	3.31773	0.0368805
5535.33	0.00046119	5.2088		3.74314	3.33612	0.0368574
5535.33	0.000442064	5.21036		3.74314	3.35452	0.0368354
5535.33	0.000423731	5.21185		3.74314	3.37291	0.0368142
5535.33	0.000406159	5.21329		3.74314	3.3913	0.0367939
5535.33	0.000389315	5.21467		3.74314	3.4097	0.0367744
5535.33	0.00037317	5.216		3.74314	3.42809	0.0367558
5535.33	0.000357694	5.21727		3.74314	3.44649	0.0367379
5535.33	0.00034286	5.21849		3.74314	3.46488	0.0367207
5535.33	0.000328642	5.21966		3.74314	3.48328	0.0367042
5535.33	0.000315012	5.22078		3.74314	3.50167	0.0366884
5535.33	0.000301949	5.22186		3.74314	3.52007	0.0366733
5535.33	0.000289427	5.22289		3.74314	3.53846	0.0366588
5535.33	0.000277424	5.22389		3.74314	3.55686	0.0366448
5535.33	0.000265919	5.22484		3.74314	3.57525	0.0366315
5535.33	0.000254891	5.22575		3.74314	3.59365	0.0366187
5535.33	0.00024432	5.22663		3.74314	3.61204	0.0366064
5535.33	0.000234188	5.22747		3.74314	3.63043	0.0365946
5535.33	0.000224476	5.22828		3.74314	3.64883	0.0365833
5535.33	0.000215167	5.22905		3.74314	3.66722	0.0365725
5535.33	0.000206244	5.22979		3.74314	3.68562	0.0365621
5535.33	0.000197691	5.2305		3.74314	3.70401	0.0365522
5535.33	0.000189492	5.23119		3.74314	3.72241	0.0365426
5535.33	0.000181634	5.23184		3.74314	3.7408	0.0365335
5535.33	0.000174102	5.23247		3.74314	3.7592	0.0365247
5535.33	0.000166881	5.23307		3.74314	3.77759	0.0365163
5535.33	0.000159961	5.23365		3.74314	3.79599	0.0365082
5535.33	0.000153327	5.2342		3.74314	3.81438	0.0365005
5535.33	0.000146968	5.23474		3.74314	3.83278	0.0364931
5535.33	0.000140874	5.23525		3.74314	3.85117	0.036486
5535.33	0.000135031	5.23573		3.74314	3.86957	0.0364792
5535.33	0.000129432	5.2362		3.74314	3.88796	0.0364726
5535.33	0.000124064	5.23665		3.74314	3.90635	0.0364664
5535.33	0.000118919	5.23708		3.74314	3.92475	0.0364604
5535.33	0.000113987	5.2375		3.74314	3.94314	0.0364546
5535.33	0.00010926	5.23789		3.74314	3.96154	0.0364491
5535.33	0.000104729	5.23827		3.74314	3.97993	0.0364438
5535.33	0.000100386	5.23864		3.74314	3.99833	0.0364387
5535.33	9.62227e-05	5.23899		3.74314	4.01672	0.0364339
5535.33	9.22323e-05	5.23932		3.74314	4.03512	0.0364292
5535.33	8.84073e-05	5.23964		3.74314	4.05351	0.0364247
5535.33	8.4741e-05	5.23995		3.74314	4.07191	0.0364204
5535.33	8.12267e-05	5.24025		3.74314	4.0903	0.0364163
5535.33	7.78582e-05	5.24053		3.74314	4.1087	0.0364124
5535.33	7.46294e-05	5.2408		3.74314	4.12709	0.0364086
5535.33	7.15344e-05	5.24106		3.74314	4.14548	0.036405
5535.33	6.85678e-05	5.24131		3.74314	4.16388	0.0364015
5535.33	6.57243e-05	5.24155		3.74314	4.18227	0.0363982
5535.33	6.29986e-05	5.24178		3.74314	4.20067	0.036395
5535.33	6.0386e-05	5.242		3.74314	4.21906	0.036392
5535.33	5.78818e-05	5.24221		3.74314	4.23746	0.036389
5535.33	5.54814e-05	5.24242		3.74314	4.25585	0.0363862
5535.33	5.31805e-05	5.24261		3.74314	4.27425	0.0363835
5535.33	5.09751e-05	5.2428		3.74314	4.29264	0.036381
5535.33	4.88611e-05	5.24297		3.74314	4.31104	0.0363785
5535.33	4.68348e-05	5.24314		3.74314	4.32943	0.0363761
5535.33	4.48925e-05	5.24331		3.74314	4.34783	0.0363738
5535.33	4.30308e-05	5.24347		3.74314	4.36622	0.0363717
5535.33	4.12463e-05	5.24362		3.74314	4.38462	0.0363696
5535.33	3.95357e-05	5.24376		3.74314	4.40301	0.0363676
5535.33	3.78962e-05	5.2439		3.74314	4.4214	0.0363657
5535.33	3.63246e-05	5.24403		3.74314	4.4398	0.0363638
5535.33	3.48182e-05	5.24416		3.74314	4.45819	0.0363621
5535.33	3.33742e-05	5.24428		3.74314	4.47659	0.0363604
5535.33	3.19902e-05	5.2444		3.74314	4.49498	0.0363587
5535.33	3.06635e-05	5.24451		3.74314	4.51338	0.0363572
5535.33	2.93919e-05	5.24462		3.74314	4.53177	0.0363557
5535.33	2.8173e-05	5.24472		3.74314	4.55017	0.0363543
5535.33	2.70046e-05	5.24482		3.74314	4.56856	0.0363529
5535.33	2.58847e-05	5.24491		3.74314	4.58696	0.0363516
5535.33	2.48113e-05	5.245		3.74314	4.60535	0.0363503
5535.33	2.37823e-05	5.24509		3.74314	4.62375	0.0363491
5535.33	2.2796e-05	5.24517		3.74314	4.64214	0.036348
5535.33	2.18507e-05	5.24525		3.74314	4.66054	0.0363469
5535.33	2.09445e-05	5.24533		3.74314	4.67893	0.0363458
5535.33	2.00759e-05	5.2454		3.74314	4.69732	0.0363448
5535.33	1.92434e-05	5.24547		3.74314	4.71572	0.0363438
5535.33	1.84453e-05	5.24554		3.74314	4.73411	0.0363429
5535.33	1.76804e-05	5.24561		3.74314	4.75251	0.036342
5535.33	1.69472e-05	5.24567		3.74314	4.7709	0.0363411
5535.33	1.62444e-05	5.24573		3.74314	4.7893	0.0363403
5535.33	1.55707e-05	5.24578		3.74314	4.80769	0.0363395
5535.33	1.4925e-05	5.24584		3.74314	4.82609	0.0363388
5535.33	1.4306e-05	5.24589		3.74314	4.84448	0.036338
5535.33	1.37127e-05	5.24594		3.74314	4.86288	0.0363373
5535.33	1.3144e-05	5.24599		3.74314	4.88127	0.0363367
5535.33	1.2599e-05	5.24604		3.74314	4.89967	0.036336
5535.33	1.20765e-05	5.24608		3.74314	4.91806	0.0363354
5535.33	1.15756e-05	5.24612		3.74314	4.93645	0.0363348
5535.33	1.10956e-05	5.24616		3.74314	4.95485	0.0363343
5535.33	1.06354e-05	5.2462		3.74314	4.97324	0.0363337
5535.33	1.01944e-05	5.24624		3.74314	4.99164	0.0363332
5535.33	9.77162e-06	5.24627		3.74314	5.01003	0.0363327
5535.33	9.36638e-06	5.24631		3.74314	5.02843	0.0363323
5535.33	8.97795e-06	5.24634		3.74314	5.04682	0.0363318
5535.33	8.60563e-06	5.24637		3.74314	5.06522	0.0363314
5535.33	8.24875e-06	5.2464		3.74314	5.08361	0.0363309
5535.33	7.90666e-06	5.24643		3.74314	5.10201	0.0363305
5535.33	7.57877e-06	5.24646		3.74314	5.1204	0.0363302
5535.33	7.26447e-06	5.24649		3.74314	5.1388	0.0363298
5535.33	6.96321e-06	5.24651		3.74314	5.15719	0.0363294
5535.33	6.67444e-06	5.24654		3.74314	5.17559	0.0363291
5535.33	6.39764e-06	5.24656		3.74314	5.19398	0.0363288
5535.33	6.13233e-06	5.24658		3.74314	5.21237	0.0363285
5535.33	5.87802e-06	5.2466		3.74314	5.23077	0.0363282
5535.33	5.63425e-06	5.24662		3.74314	5.24916	0.0363279
5535.33	5.40059e-06	5.24664		3.74314	5.26756	0.0363276
5535.33	5.17663e-06	5.24666		3.74314	5.28595	0.0363273
5535.33	4.96195e-06	5.24668		3.74314	5.30435	0.0363271
5535.33	4.75617e-06	5.2467		3.74314	5.32274	0.0363269
5535.33	4.55893e-06	5.24672		3.74314	5.34114	0.0363266
5535.33	4.36987e-06	5.24673		3.74314	5.35953	0.0363264
5535.33	4.18865e-06	5.24675		3.74314	5.37793	0.0363262
5535.33	4.01494e-06	5.24676		3.74314	5.39632	0.036326
5535.33	3.84844e-06	5.24678		3.74314	5.41472	0.0363258
5535.33	3.68884e-06	5.24679		3.74314	5.43311	0.0363256
5535.33	3.53586e-06	5.2468		3.74314	5.45151	0.0363254
5535.33	3.38922e-06	5.24681		3.74314	5.4699	0.0363252
5535.33	3.24867e-06	5.24683		3.74314	5.48829	0.0363251
5535.33	3.11395e-06	5.24684		3.74314	5.50669	0.0363249
5535.33	2.98481e-06	5.24685		3.74314	5.52508	0.0363248
5535.33	2.86103e-06	5.24686		3.74314	5.54348	0.0363246
5535.33	2.74238e-06	5.24687		3.74314	5.56187	0.0363245
5535.33	2.62865e-06	5.24688		3.74314	5.58027	0.0363244
5535.33	2.51964e-06	5.24689		3.74314	5.59866	0.0363242
5535.33	2.41514e-06	5.2469		3.74314	5.61706	0.0363241
5535.33	2.31499e-06	5.24691		3.74314	5.63545	0.036324
5535.33	2.21898e-06	5.24691		3.74314	5.65385	0.0363239
5535.33	2.12696e-06	5.24692		3.74314	5.67224	0.0363238
5535.33	2.03875e-06	5.24693		3.74314	5.69064	0.0363237
5535.33	1.9542e-06	5.24694		3.74314	5.70903	0.0363236
5535.33	1.87316e-06	5.24694		3.74314	5.72742	0.0363235
5535.33	1.79548e-06	5.24695		3.74314	5.74582	0.0363234
5535.33	1.72102e-06	5.24696		3.74314	5.76421	0.0363233
5535.33	1.64965e-06	5.24696		3.74314	5.78261	0.0363232
5535.33	1.58124e-06	5.24697		3.74314	5.801	0.0363231
5535.33	1.51566e-06	5.24697		3.74314	5.8194	0.0363231
5535.33	1.45281e-06	5.24698		3.74314	5.83779	0.036323
5535.33	1.39256e-06	5.24698		3.74314	5.85619	0.0363229
5535.33	1.33481e-06	5.24699		3.74314	5.87458	0.0363228
5535.33	1.27945e-06	5.24699		3.74314	5.89298	0.0363228
5535.33	1.22639e-06	5.247		3.74314	5.91137	0.0363227
5535.33	1.17553e-06	5.247		3.74314	5.92977	0.0363227
5535.33	1.12678e-06	5.24701		3.74314	5.94816	0.0363226
5535.33	1.08005e-06	5.24701		3.74314	5.96656	0.0363225
5535.33	1.03526e-06	5.24701		3.74314	5.98495	0.0363225
5535.33	9.92329e-07	5.24702		3.74314	6.00334	0.0363224
5535.33	9.51176e-07	5.24702		3.74314	6.02174	0.0363224
5535.33	9.1173e-07	5.24702		3.74314	6.04013	0.0363223
5535.33	8.7392e-07	5.24703		3.74314	6.05853	0.0363223
5535.33	8.37678e-07	5.24703		3.74314	6.07692	0.0363223
5535.33	8.02938e-07	5.24703		3.74314	6.09532	0.0363222
5535.33	7.6964e-07	5.24704		3.74314	6.11371	0.0363222
5535.33	7.37722e-07	5.24704		3.74314	6.13211	0.0363221
5535.33	7.07128e-07	5.24704		3.74314	6.1505	0.0363221
5535.33	6.77803e-07	5.24704		3.74314	6.1689	0.0363221
5535.33	6.49694e-07	5.24705		3.74314	6.18729	0.036322
5535.33	6.22751e-07	5.24705		3.74314	6.20569	0.036322
5535.33	5.96925e-07	5.24705		3.74314	6.22408	0.036322
5535.33	5.7217e-07	5.24705		3.74314	6.24247	0.0363219
5535.33	5.48442e-07	5.24705		3.74314	6.26087	0.0363219
5535.33	5.25697e-07	5.24706		3.74314	6.27926	0.0363219
5535.33	5.03896e-07	5.24706		3.74314	6.29766	0.0363219
5535.33	4.82999e-07	5.24706		3.74314	6.31605	0.0363218
5535.33	4.62969e-07	5.24706		3.74314	6.33445	0.0363218
5535.33	4.43769e-07	5.24706		3.74314	6.35284	0.0363218
5535.33	4.25366e-07	5.24707		3.74314	6.37124	0.0363218
5535.33	4.07726e-07	5.24707		3.74314	6.38963	0.0363218
5535.33	3.90817e-07	5.24707		3.74314	6.40803	0.0363217
5535.33	3.74609e-07	5.24707		3.74314	6.42642	0.0363217
5535.33	3.59074e-07	5.24707		3.74314	6.44482	0.0363217
5535.33	3.44183e-07	5.24707		3.74314	6.46321	0.0363217
5535.33	3.29909e-07	5.24707		3.74314	6.48161	0.0363217
5535.33	3.16228e-07	5.24707		3.74314	6.5	0.0363216
5721.7	0.1	3.09385		3.75753	1	0.104473
5721.7	0.0958529	3.12836		3.75753	1.01839	0.10218
5721.7	0.0918778	3.16276		3.75753	1.03679	0.0999696
5721.7	0.0880676	3.19704		3.75753	1.05518	0.097837
5721.7	0.0844153	3.23121		3.75753	1.07358	0.0957791
5721.7	0.0809146	3.26524		3.75753	1.09197	0.0937927
5721.7	0.077559	3.29915		3.75753	1.11037	0.0918748
5721.7	0.0743426	3.33292		3.75753	1.12876	0.0900225
5721.7	0.0712595	3.36654		3.75753	1.14716	0.0882331
5721.7	0.0683043	3.40002		3.75753	1.16555	0.0865041
5721.7	0.0654717	3.43334		3.75753	1.18395	0.0848331
5721.7	0.0627565	3.46651		3.75753	1.20234	0.0832178
5721.7	0.060154	3.4995		3.75753	1.22074	0.0816559
5721.7	0.0576593	3.53232		3.75753	1.23913	0.0801454
5721.7	0.0552681	3.56497		3.75753	1.25753	0.0786844
5721.7	0.0529761	3.59742		3.75753	1.27592	0.077271
5721.7	0.0507792	3.62969		3.75753	1.29431	0.0759034
5721.7	0.0486733	3.66175		3.75753	1.31271	0.07458
5721.7	0.0466548	3.69361		3.75753	1.3311	0.0732991
5721.7	0.04472	3.72525		3.75753	1.3495	0.0720592
5721.7	0.0428654	3.75667		3.75753	1.36789	0.0708589
5721.7	0.0410878	3.78786		3.75753	1.38629	0.0696967
5721.7	0.0393838	3.81881		3.75753	1.40468	0.0685714
5721.7	0.0377505	3.84952		3.75753	1.42308	0.0674817
5721.7	0.036185	3.87998		3.75753	1.44147	0.0664264
5721.7	0.0346844	3.91018		3.75753	1.45987	0.0654044
5721.7	0.033246	3.94011		3.75753	1.47826	0.0644145
5721.7	0.0318672	3.96976		3.75753	1.49666	0.0634557
5721.7	0.0305457	3.99914		3.75753	1.51505	0.062527
5721.7	0.0292789	4.02822		3.75753	1.53344	0.0616274
5721.7	0.0280647	4.057		3.75753	1.55184	0.060756
5721.7	0.0269008	4.08548		3.75753	1.57023	0.0599119
5721.7	0.0257852	4.11365		3.75753	1.58863	0.0590943
5721.7	0.0247159	4.14149		3.75753	1.60702	0.0583024
5721.7	0.0236909	4.16901		3.75753	1.62542	0.0575353
5721.7	0.0227084	4.19619		3.75753	1.64381	0.0567923
5721.7	0.0217667	4.22303		3.75753	1.66221	0.0560728
5721.7	0.020864	4.24952		3.75753	1.6806	0.0553759
5721.7	0.0199988	4.27565		3.75753	1.699	0.054701
5721.7	0.0191694	4.30142		3.75753	1.71739	0.0540475
5721.7	0.0183744	4.32683		3.75753	1.73579	0.0534148
5721.7	0.0176124	4.35185		3.75753	1.75418	0.0528021
5721.7	0.016882	4.3765		3.75753	1.77258	0.0522091
5721.7	0.0161819	4.40076		3.75753	1.79097	0.051635
5721.7	0.0155108	4.42464		3.75753	1.80936	0.0510793
5721.7	0.0148676	4.44811		3.75753	1.82776	0.0505415
5721.7	0.014251	4.47119		3.75753	1.84615	0.0500211
5721.7	0.01366	4.49387		3.75753	1.86455	0.0495176
5721.7	0.0130935	4.51613		3.75753	1.88294	0.0490305
5721.7	0.0125505	4.53799		3.75753	1.90134	0.0485594
5721.7	0.0120301	4.55943		3.75753	1.91973	0.0481037
5721.7	0.0115312	4.58046		3.75753	1.93813	0.047663
5721.7	0.011053	4.60107		3.75753	1.95652	0.0472369
5721.7	0.0105946	4.62127		3.75753	1.97492	0.046825
5721.7	0.0101552	4.64104		3.75753	1.99331	0.0464269
5721.7	0.00973407	4.66039		3.75753	2.01171	0.0460421
5721.7	0.00933039	4.67932		3.75753	2.0301	0.0456703
5721.7	0.00894345	4.69783		3.75753	2.04849	0.0453111
5721.7	0.00857256	4.71592		3.75753	2.06689	0.0449642
5721.7	0.00821705	4.7336		3.75753	2.08528	0.044629
5721.7	0.00787628	4.75085		3.75753	2.10368	0.0443054
5721.7	0.00754964	4.76769		3.75753	2.12207	0.043993
5721.7	0.00723655	4.78412		3.75753	2.14047	0.0436914
5721.7	0.00693645	4.80014		3.75753	2.15886	0.0434003
5721.7	0.00664879	4.81575		3.75753	2.17726	0.0431194
5721.7	0.00637306	4.83095		3.75753	2.19565	0.0428484
5721.7	0.00610876	4.84576		3.75753	2.21405	0.0425869
5721.7	0.00585543	4.86017		3.75753	2.23244	0.0423347
5721.7	0.0056126	4.87419		3.75753	2.25084	0.0420915
5721.7	0.00537984	4.88783		3.75753	2.26923	0.041857
5721.7	0.00515673	4.90108		3.75753	2.28763	0.0416309
5721.7	0.00494288	4.91396		3.75753	2.30602	0.041413
5721.7	0.00473789	4.92646		3.75753	2.32441	0.041203
5721.7	0.00454141	4.93861		3.75753	2.34281	0.0410007
5721.7	0.00435307	4.95039		3.75753	2.3612	0.0408057
5721.7	0.00417255	4.96182		3.75753	2.3796	0.0406179
5721.7	0.00399951	4.97291		3.75753	2.39799	0.040437
5721.7	0.00383365	4.98365		3.75753	2.41639	0.0402628
5721.7	0.00367466	4.99407		3.75753	2.43478	0.0400951
5721.7	0.00352227	5.00415		3.75753	2.45318	0.0399336
5721.7	0.0033762	5.01392		3.75753	2.47157	0.0397782
5721.7	0.00323619	5.02338		3.75753	2.48997	0.0396286
5721.7	0.00310198	5.03253		3.75753	2.50836	0.0394846
5721.7	0.00297334	5.04138		3.75753	2.52676	0.0393461
5721.7	0.00285003	5.04994		3.75753	2.54515	0.0392128
5721.7	0.00273184	5.05822		3.75753	2.56355	0.0390846
5721.7	0.00261855	5.06622		3.75753	2.58194	0.0389612
5721.7	0.00250995	5.07394		3.75753	2.60033	0.0388426
5721.7	0.00240586	5.08141		3.75753	2.61873	0.0387286
5721.7	0.00230609	5.08862		3.75753	2.63712	0.0386189
5721.7	0.00221045	5.09558		3.75753	2.65552	0.0385134
5721.7	0.00211879	5.1023		3.75753	2.67391	0.0384121
5721.7	0.00203092	5.10878		3.75753	2.69231	0.0383146
5721.7	0.00194669	5.11504		3.75753	2.7107	0.038221
5721.7	0.00186596	5.12107		3.75753	2.7291	0.038131
5721.7	0.00178858	5.12689		3.75753	2.74749	0.0380445
5721.7	0.00171441	5.1325		3.75753	2.76589	0.0379614
5721.7	0.00164331	5.1379		3.75753	2.78428	0.0378816
5721.7	0.00157516	5.14311		3.75753	2.80268	0.0378049
5721.7	0.00150984	5.14813		3.75753	2.82107	0.0377312
5721.7	0.00144722	5.15297		3.75753	2.83946	0.0376604
5721.7	0.0013872	5.15762		3.75753	2.85786	0.0375924
5721.7	0.00132968	5.16211		3.75753	2.87625	0.0375272
5721.7	0.00127453	5.16643		3.75753	2.89465	0.0374645
5721.7	0.00122168	5.17058		3.75753	2.91304	0.0374043
5721.7	0.00117101	5.17458		3.75753	2.93144	0.0373465
5721.7	0.00112245	5.17843		3.75753	2.94983	0.037291
5721.7	0.0010759	5.18213		3.75753	2.96823	0.0372377
5721.7	0.00103128	5.1857		3.75753	2.98662	0.0371865
5721.7	0.000988515	5.18912		3.75753	3.00502	0.0371374
5721.7	0.000947521	5.19242		3.75753	3.02341	0.0370903
5721.7	0.000908226	5.19559		3.75753	3.04181	0.0370451
5721.7	0.000870561	5.19864		3.75753	3.0602	0.0370016
5721.7	0.000834458	5.20157		3.75753	3.0786	0.03696
5721.7	0.000799853	5.20438		3.75753	3.09699	0.03692
5721.7	0.000766682	5.20709		3.75753	3.11538	0.0368816
5721.7	0.000734887	5.20969		3.75753	3.13378	0.0368448
5721.7	0.000704411	5.21219		3.75753	3.15217	0.0368094
5721.7	0.000675198	5.2146		3.75753	3.17057	0.0367755
5721.7	0.000647197	5.2169		3.75753	3.18896	0.036743
5721.7	0.000620358	5.21912		3.75753	3.20736	0.0367118
5721.7	0.000594631	5.22125		3.75753	3.22575	0.0366818
5721.7	0.000569971	5.2233		3.75753	3.24415	0.0366531
5721.7	0.000546334	5.22526		3.75753	3.26254	0.0366255
5721.7	0.000523677	5.22715		3.75753	3.28094	0.0365991
5721.7	0.00050196	5.22896		3.75753	3.29933	0.0365737
5721.7	0.000481143	5.2307		3.75753	3.31773	0.0365494
5721.7	0.00046119	5.23237		3.75753	3.33612	0.036526
5721.7	0.000442064	5.23398		3.75753	3.35452	0.0365036
5721.7	0.000423731	5.23552		3.75753	3.37291	0.0364822
5721.7	0.000406159	5.237		3.75753	3.3913	0.0364616
5721.7	0.000389315	5.23842		3.75753	3.4097	0.0364418
5721.7	0.00037317	5.23978		3.75753	3.42809	0.0364229
5721.7	0.000357694	5.24109		3.75753	3.44649	0.0364047
5721.7	0.00034286	5.24234		3.75753	3.46488	0.0363873
5721.7	0.000328642	5.24354		3.75753	3.48328	0.0363706
5721.7	0.000315012	5.2447		3.75753	3.50167	0.0363545
5721.7	0.000301949	5.24581		3.75753	3.52007	0.0363392
5721.7	0.000289427	5.24687		3.75753	3.53846	0.0363244
5721.7	0.000277424	5.24789		3.75753	3.55686	0.0363103
5721.7	0.000265919	5.24887		3.75753	3.57525	0.0362967
5721.7	0.000254891	5.24981		3.75753	3.59365	0.0362838
5721.7	0.00024432	5.25072		3.75753	3.61204	0.0362713
5721.7	0.000234188	5.25158		3.75753	3.63043	0.0362593
5721.7	0.000224476	5.25241		3.75753	3.64883	0.0362479
5721.7	0.000215167	5.25321		3.75753	3.66722	0.0362369
5721.7	0.000206244	5.25397		3.75753	3.68562	0.0362264
5721.7	0.000197691	5.2547		3.75753	3.70401	0.0362163
5721.7	0.000189492	5.25541		3.75753	3.72241	0.0362066
5721.7	0.000181634	5.25608		3.75753	3.7408	0.0361973
5721.7	0.000174102	5.25673		3.75753	3.7592	0.0361884
5721.7	0.000166881	5.25735		3.75753	3.77759	0.0361798
5721.7	0.000159961	5.25794		3.75753	3.79599	0.0361717
5721.7	0.000153327	5.25851		3.75753	3.81438	0.0361638
5721.7	0.000146968	5.25906		3.75753	3.83278	0.0361563
5721.7	0.000140874	5.25958		3.75753	3.85117	0.0361491
5721.7	0.000135031	5.26009		3.75753	3.86957	0.0361422
5721.7	0.000129432	5.26057		3.75753	3.88796	0.0361355
5721.7	0.000124064	5.26103		3.75753	3.90635	0.0361292
5721.7	0.000118919	5.26148		3.75753	3.92475	0.0361231
5721.7	0.000113987	5.2619		3.75753	3.94314	0.0361172
5721.7	0.00010926	5.26231		3.75753	3.96154	0.0361116
5721.7	0.000104729	5.2627		3.75753	3.97993	0.0361063
5721.7	0.000100386	5.26308		3.75753	3.99833	0.0361011
5721.7	9.62227e-05	5.26344		3.75753	4.01672	0.0360962
5721.7	9.22323e-05	5.26378		3.75753	4.03512	0.0360915
5721.7	8.84073e-05	5.26411		3.75753	4.05351	0.0360869
5721.7	8.4741e-05	5.26443		3.75753	4.07191	0.0360826
5721.7	8.12267e-05	5.26473		3.75753	4.0903	0.0360784
5721.7	7.78582e-05	5.26502		3.75753	4.1087	0.0360744
5721.7	7.46294e-05	5.2653		3.75753	4.12709	0.0360706
5721.7	7.15344e-05	5.26557		3.75753	4.14548	0.0360669
5721.7	6.85678e-05	5.26583		3.75753	4.16388	0.0360634
5721.7	6.57243e-05	5.26608		3.75753	4.18227	0.03606
5721.7	6.29986e-05	5.26631		3.75753	4.20067	0.0360568
5721.7	6.0386e-05	5.26654		3.75753	4.21906	0.0360537
5721.7	5.78818e-05	5.26676		3.75753	4.23746	0.0360507
5721.7	5.54814e-05	5.26696		3.75753	4.25585	0.0360479
5721.7	5.31805e-05	5.26716		3.75753	4.27425	0.0360451
5721.7	5.09751e-05	5.26735		3.75753	4.29264	0.0360425
5721.7	4.88611e-05	5.26754		3.75753	4.31104	0.03604
5721.7	4.68348e-05	5.26771		3.75753	4.32943	0.0360376
5721.7	4.48925e-05	5.26788		3.75753	4.34783	0.0360353
5721.7	4.30308e-05	5.26804		3.75753	4.36622	0.0360331
5721.7	4.12463e-05	5.2682		3.75753	4.38462	0.0360309
5721.7	3.95357e-05	5.26835		3.75753	4.40301	0.0360289
5721.7	3.78962e-05	5.26849		3.75753	4.4214	0.036027
5721.7	3.63246e-05	5.26863		3.75753	4.4398	0.0360251
5721.7	3.48182e-05	5.26876		3.75753	4.45819	0.0360233
5721.7	3.33742e-05	5.26888		3.75753	4.47659	0.0360216
5721.7	3.19902e-05	5.269		3.75753	4.49498	0.03602
5721.7	3.06635e-05	5.26912		3.75753	4.51338	0.0360184
5721.7	2.93919e-05	5.26923		3.75753	4.53177	0.0360169
5721.7	2.8173e-05	5.26933		3.75753	4.55017	0.0360154
5721.7	2.70046e-05	5.26944		3.75753	4.56856	0.036014
5721.7	2.58847e-05	5.26953		3.75753	4.58696	0.0360127
5721.7	2.48113e-05	5.26963		3.75753	4.60535	0.0360114
5721.7	2.37823e-05	5.26972		3.75753	4.62375	0.0360102
5721.7	2.2796e-05	5.2698		3.75753	4.64214	0.036009
5721.7	2.18507e-05	5.26988		3.75753	4.66054	0.0360079
5721.7	2.09445e-05	5.26996		3.75753	4.67893	0.0360068
5721.7	2.00759e-05	5.27004		3.75753	4.69732	0.0360058
5721.7	1.92434e-05	5.27011		3.75753	4.71572	0.0360048
5721.7	1.84453e-05	5.27018		3.75753	4.73411	0.0360039
5721.7	1.76804e-05	5.27025		3.75753	4.75251	0.0360029
5721.7	1.69472e-05	5.27031		3.75753	4.7709	0.0360021
5721.7	1.62444e-05	5.27037		3.75753	4.7893	0.0360012
5721.7	1.55707e-05	5.27043		3.75753	4.80769	0.0360004
5721.7	1.4925e-05	5.27049		3.75753	4.82609	0.0359997
5721.7	1.4306e-05	5.27054		3.75753	4.84448	0.0359989
5721.7	1.37127e-05	5.27059		3.75753	4.86288	0.0359982
5721.7	1.3144e-05	5.27064		3.75753	4.88127	0.0359975
5721.7	1.2599e-05	5.27069		3.75753	4.89967	0.0359969
5721.7	1.20765e-05	5.27074		3.75753	4.91806	0.0359963
5721.7	1.15756e-05	5.27078		3.75753	4.93645	0.0359957
5721.7	1.10956e-05	5.27082		3.75753	4.95485	0.0359951
5721.7	1.06354e-05	5.27086		3.75753	4.97324	0.0359946
5721.7	1.01944e-05	5.2709		3.75753	4.99164	0.035994
5721.7	9.77162e-06	5.27094		3.75753	5.01003	0.0359935
5721.7	9.36638e-06	5.27097		3.75753	5.02843	0.0359931
5721.7	8.97795e-06	5.271		3.75753	5.04682	0.0359926
5721.7	8.60563e-06	5.27104		3.75753	5.06522	0.0359922
5721.7	8.24875e-06	5.27107		3.75753	5.08361	0.0359917
5721.7	7.90666e-06	5.2711		3.75753	5.10201	0.0359913
5721.7	7.57877e-06	5.27113		3.75753	5.1204	0.0359909
5721.7	7.26447e-06	5.27115		3.75753	5.1388	0.0359906
5721.7	6.96321e-06	5.27118		3.75753	5.15719	0.0359902
5721.7	6.67444e-06	5.27121		3.75753	5.17559	0.0359899
5721.7	6.39764e-06	5.27123		3.75753	5.19398	0.0359895
5721.7	6.13233e-06	5.27125		3.75753	5.21237	0.0359892
5721.7	5.87802e-06	5.27127		3.75753	5.23077	0.0359889
5721.7	5.63425e-06	5.2713		3.75753	5.24916	0.0359886
5721.7	5.40059e-06	5.27132		3.75753	5.26756	0.0359883
5721.7	5.17663e-06	5.27134		3.75753	5.28595	0.0359881
5721.7	4.96195e-06	5.27135		3.75753	5.30435	0.0359878
5721.7	4.75617e-06	5.27137		3.75753	5.32274	0.0359876
5721.7	4.55893e-06	5.27139		3.75753	5.34114	0.0359873
5721.7	4.36987e-06	5.27141		3.75753	5.35953	0.0359871
5721.7	4.18865e-06	5.27142		3.75753	5.37793	0.0359869
5721.7	4.01494e-06	5.27144		3.75753	5.39632	0.0359867
5721.7	3.84844e-06	5.27145		3.75753	5.41472	0.0359865
5721.7	3.68884e-06	5.27147		3.75753	5.43311	0.0359863
5721.7	3.53586e-06	5.27148		3.75753	5.45151	0.0359861
5721.7	3.38922e-06	5.27149		3.75753	5.4699	0.0359859
5721.7	3.24867e-06	5.2715		3.75753	5.48829	0.0359858
5721.7	3.11395e-06	5.27152		3.75753	5.50669	0.0359856
5721.7	2.98481e-06	5.27153		3.75753	5.52508	0.0359855
5721.7	2.86103e-06	5.27154		3.75753	5.54348	0.0359853
5721.7	2.74238e-06	5.27155		3.75753	5.56187	0.0359852
5721.7	2.62865e-06	5.27156		3.75753	5.58027	0.035985
5721.7	2.51964e-06	5.27157		3.75753	5.59866	0.0359849
5721.7	2.41514e-06	5.27158		3.75753	5.61706	0.0359848
5721.7	2.31499e-06	5.27159		3.75753	5.63545	0.0359847
5721.7	2.21898e-06	5.27159		3.75753	5.65385	0.0359846
5721.7	2.12696e-06	5.2716		3.75753	5.67224	0.0359844
5721.7	2.03875e-06	5.27161		3.75753	5.69064	0.0359843
5721.7	1.9542e-06	5.27162		3.75753	5.70903	0.0359842
5721.7	1.87316e-06	5.27162		3.75753	5.72742	0.0359841
5721.7	1.79548e-06	5.27163		3.75753	5.74582	0.0359841
5721.7	1.72102e-06	5.27164		3.75753	5.76421	0.035984
5721.7	1.64965e-06	5.27164		3.75753	5.78261	0.0359839
5721.7	1.58124e-06	5.27165		3.75753	5.801	0.0359838
5721.7	1.51566e-06	5.27165		3.75753	5.8194	0.0359837
5721.7	1.45281e-06	5.27166		3.75753	5.83779	0.0359836
5721.7	1.39256e-06	5.27167		3.75753	5.85619	0.0359836
5721.7	1.33481e-06	5.27167		3.75753	5.87458	0.0359835
5721.7	1.27945e-06	5.27168		3.75753	5.89298	0.0359834
5721.7	1.22639e-06	5.27168		3.75753	5.91137	0.0359834
5721.7	1.17553e-06	5.27168		3.75753	5.92977	0.0359833
5721.7	1.12678e-06	5.27169		3.75753	5.94816	0.0359833
5721.7	1.08005e-06	5.27169		3.75753	5.96656	0.0359832
5721.7	1.03526e-06	5.2717		3.75753	5.98495	0.0359831
5721.7	9.92329e-07	5.2717		3.75753	6.00334	0.0359831
5721.7	9.51176e-07	5.2717		3.75753	6.02174	0.035983
5721.7	9.1173e-07	5.27171		3.75753	6.04013	0.035983
5721.7	8.7392e-07	5.27171		3.75753	6.05853	0.035983
5721.7	8.37678e-07	5.27171		3.75753	6.07692	0.0359829
5721.7	8.02938e-07	5.27172		3.75753	6.09532	0.0359829
5721.7	7.6964e-07	5.27172		3.75753	6.11371	0.0359828
5721.7	7.37722e-07	5.27172		3.75753	6.13211	0.0359828
5721.7	7.07128e-07	5.27173		3.75753	6.1505	0.0359828
5721.7	6.77803e-07	5.27173		3.75753	6.1689	0.0359827
5721.7	6.49694e-07	5.27173		3.75753	6.18729	0.0359827
5721.7	6.22751e-07	5.27173		3.75753	6.20569	0.0359827
5721.7	5.96925e-07	5.27173		3.75753	6.22408	0.0359826
5721.7	5.7217e-07	5.27174		3.75753	6.24247	0.0359826
5721.7	5.48442e-07	5.27174		3.75753	6.26087	0.0359826
5721.7	5.25697e-07	5.27174		3.75753	6.27926	0.0359825
5721.7	5.03896e-07	5.27174		3.75753	6.29766	0.0359825
5721.7	4.82999e-07	5.27174		3.75753	6.31605	0.0359825
5721.7	4.62969e-07	5.27175		3.75753	6.33445	0.0359825
5721.7	4.43769e-07	5.27175		3.75753	6.35284	0.0359824
5721.7	4.25366e-07	5.27175		3.75753	6.37124	0.0359824
5721.7	4.07726e-07	5.27175		3.75753	6.38963	0.0359824
5721.7	3.90817e-07	5.27175		3.75753	6.40803	0.0359824
5721.7	3.74609e-07	5.27175		3.75753	6.42642	0.0359824
5721.7	3.59074e-07	5.27176		3.75753	6.44482	0.0359823
5721.7	3.44183e-07	5.27176		3.75753	6.46321	0.0359823
5721.7	3.29909e-07	5.27176		3.75753	6.48161	0.0359823
5721.7	3.16228e-07	5.27176		3.75753	6.5	0.0359823
5914.34	0.1	3.09518		3.77191	1	0.104382
5914.34	0.0958529	3.12976		3.77191	1.01839	0.102089
5914.34	0.0918778	3.16424		3.77191	1.03679	0.0998763
5914.34	0.0880676	3.1986		3.77191	1.05518	0.097742
5914.34	0.0844153	3.23284		3.77191	1.07358	0.0956824
5914.34	0.0809146	3.26696		3.77191	1.09197	0.0936943
5914.34	0.077559	3.30095		3.77191	1.11037	0.0917746
5914.34	0.0743426	3.33481		3.77191	1.12876	0.0899205
5914.34	0.0712595	3.36853		3.77191	1.14716	0.0881293
5914.34	0.0683043	3.4021		3.77191	1.16555	0.0863985
5914.34	0.0654717	3.43552		3.77191	1.18395	0.0847255
5914.34	0.0627565	3.46879		3.77191	1.20234	0.0831082
5914.34	0.060154	3.5019		3.77191	1.22074	0.0815442
5914.34	0.0576593	3.53483		3.77191	1.23913	0.0800317
5914.34	0.0552681	3.56759		3.77191	1.25753	0.0785686
5914.34	0.0529761	3.60017		3.77191	1.27592	0.077153
5914.34	0.0507792	3.63256		3.77191	1.29431	0.0757833
5914.34	0.0486733	3.66476		3.77191	1.31271	0.0744576
5914.34	0.0466548	3.69675		3.77191	1.3311	0.0731744
5914.34	0.04472	3.72854		3.77191	1.3495	0.0719322
5914.34	0.0428654	3.7601		3.77191	1.36789	0.0707295
5914.34	0.0410878	3.79145		3.77191	1.38629	0.0695649
5914.34	0.0393838	3.82256		3.77191	1.40468	0.0684372
5914.34	0.0377505	3.85343		3.77191	1.42308	0.067345
5914.34	0.036185	3.88405		3.77191	1.44147	0.0662872
5914.34	0.0346844	3.91442		3.77191	1.45987	0.0652626
5914.34	0.033246	3.94453		3.77191	1.47826	0.0642701
5914.34	0.0318672	3.97437		3.77191	1.49666	0.0633087
5914.34	0.0305457	4.00393		3.77191	1.51505	0.0623773
5914.34	0.0292789	4.03321		3.77191	1.53344	0.061475
5914.34	0.0280647	4.06219		3.77191	1.55184	0.0606009
5914.34	0.0269008	4.09088		3.77191	1.57023	0.0597541
5914.34	0.0257852	4.11925		3.77191	1.58863	0.0589337
5914.34	0.0247159	4.14731		3.77191	1.60702	0.058139
5914.34	0.0236909	4.17504		3.77191	1.62542	0.0573691
5914.34	0.0227084	4.20245		3.77191	1.64381	0.0566232
5914.34	0.0217667	4.22952		3.77191	1.66221	0.0559008
5914.34	0.020864	4.25624		3.77191	1.6806	0.055201
5914.34	0.0199988	4.28262		3.77191	1.699	0.0545233
5914.34	0.0191694	4.30863		3.77191	1.71739	0.0538669
5914.34	0.0183744	4.33428		3.77191	1.73579	0.0532312
5914.34	0.0176124	4.35956		3.77191	1.75418	0.0526156
5914.34	0.016882	4.38446		3.77191	1.77258	0.0520196
5914.34	0.0161819	4.40899		3.77191	1.79097	0.0514426
5914.34	0.0155108	4.43312		3.77191	1.80936	0.0508839
5914.34	0.0148676	4.45686		3.77191	1.82776	0.0503432
5914.34	0.014251	4.48021		3.77191	1.84615	0.0498199
5914.34	0.01366	4.50316		3.77191	1.86455	0.0493135
5914.34	0.0130935	4.5257		3.77191	1.88294	0.0488235
5914.34	0.0125505	4.54783		3.77191	1.90134	0.0483494
5914.34	0.0120301	4.56956		3.77191	1.91973	0.0478908
5914.34	0.0115312	4.59087		3.77191	1.93813	0.0474472
5914.34	0.011053	4.61176		3.77191	1.95652	0.0470183
5914.34	0.0105946	4.63223		3.77191	1.97492	0.0466035
5914.34	0.0101552	4.65229		3.77191	1.99331	0.0462026
5914.34	0.00973407	4.67193		3.77191	2.01171	0.045815
5914.34	0.00933039	4.69114		3.77191	2.0301	0.0454404
5914.34	0.00894345	4.70994		3.77191	2.04849	0.0450785
5914.34	0.00857256	4.72832		3.77191	2.06689	0.0447288
5914.34	0.00821705	4.74627		3.77191	2.08528	0.044391
5914.34	0.00787628	4.76381		3.77191	2.10368	0.0440647
5914.34	0.00754964	4.78093		3.77191	2.12207	0.0437497
5914.34	0.00723655	4.79764		3.77191	2.14047	0.0434455
5914.34	0.00693645	4.81393		3.77191	2.15886	0.0431519
5914.34	0.00664879	4.82982		3.77191	2.17726	0.0428685
5914.34	0.00637306	4.8453		3.77191	2.19565	0.042595
5914.34	0.00610876	4.86038		3.77191	2.21405	0.0423311
5914.34	0.00585543	4.87506		3.77191	2.23244	0.0420765
5914.34	0.0056126	4.88935		3.77191	2.25084	0.041831
5914.34	0.00537984	4.90324		3.77191	2.26923	0.0415942
5914.34	0.00515673	4.91676		3.77191	2.28763	0.0413659
5914.34	0.00494288	4.92989		3.77191	2.30602	0.0411458
5914.34	0.00473789	4.94265		3.77191	2.32441	0.0409337
5914.34	0.00454141	4.95504		3.77191	2.34281	0.0407292
5914.34	0.00435307	4.96706		3.77191	2.3612	0.0405322
5914.34	0.00417255	4.97874		3.77191	2.3796	0.0403424
5914.34	0.00399951	4.99006		3.77191	2.39799	0.0401596
5914.34	0.00383365	5.00103		3.77191	2.41639	0.0399835
5914.34	0.00367466	5.01167		3.77191	2.43478	0.0398139
5914.34	0.00352227	5.02198		3.77191	2.45318	0.0396506
5914.34	0.0033762	5.03197		3.77191	2.47157	0.0394934
5914.34	0.00323619	5.04163		3.77191	2.48997	0.0393421
5914.34	0.00310198	5.05099		3.77191	2.50836	0.0391964
5914.34	0.00297334	5.06005		3.77191	2.52676	0.0390563
5914.34	0.00285003	5.06881		3.77191	2.54515	0.0389214
5914.34	0.00273184	5.07728		3.77191	2.56355	0.0387917
5914.34	0.00261855	5.08546		3.77191	2.58194	0.0386669
5914.34	0.00250995	5.09338		3.77191	2.60033	0.0385468
5914.34	0.00240586	5.10102		3.77191	2.61873	0.0384313
5914.34	0.00230609	5.10841		3.77191	2.63712	0.0383203
5914.34	0.00221045	5.11554		3.77191	2.65552	0.0382136
5914.34	0.00211879	5.12242		3.77191	2.67391	0.0381109
5914.34	0.00203092	5.12907		3.77191	2.69231	0.0380122
5914.34	0.00194669	5.13548		3.77191	2.7107	0.0379174
5914.34	0.00186596	5.14166		3.77191	2.7291	0.0378262
5914.34	0.00178858	5.14762		3.77191	2.74749	0.0377386
5914.34	0.00171441	5.15338		3.77191	2.76589	0.0376545
5914.34	0.00164331	5.15892		3.77191	2.78428	0.0375736
5914.34	0.00157516	5.16426		3.77191	2.80268	0.0374959
5914.34	0.00150984	5.16941		3.77191	2.82107	0.0374212
5914.34	0.00144722	5.17437		3.77191	2.83946	0.0373495
5914.34	0.0013872	5.17915		3.77191	2.85786	0.0372806
5914.34	0.00132968	5.18375		3.77191	2.87625	0.0372144
5914.34	0.00127453	5.18818		3.77191	2.89465	0.0371509
5914.34	0.00122168	5.19245		3.77191	2.91304	0.0370899
5914.34	0.00117101	5.19656		3.77191	2.93144	0.0370313
5914.34	0.00112245	5.20051		3.77191	2.94983	0.036975
5914.34	0.0010759	5.20431		3.77191	2.96823	0.036921
5914.34	0.00103128	5.20797		3.77191	2.98662	0.0368692
5914.34	0.000988515	5.21149		3.77191	3.00502	0.0368194
5914.34	0.000947521	5.21487		3.77191	3.02341	0.0367716
5914.34	0.000908226	5.21813		3.77191	3.04181	0.0367257
5914.34	0.000870561	5.22126		3.77191	3.0602	0.0366817
5914.34	0.000834458	5.22427		3.77191	3.0786	0.0366394
5914.34	0.000799853	5.22716		3.77191	3.09699	0.0365989
5914.34	0.000766682	5.22995		3.77191	3.11538	0.0365599
5914.34	0.000734887	5.23262		3.77191	3.13378	0.0365226
5914.34	0.000704411	5.23519		3.77191	3.15217	0.0364867
5914.34	0.000675198	5.23766		3.77191	3.17057	0.0364524
5914.34	0.000647197	5.24003		3.77191	3.18896	0.0364194
5914.34	0.000620358	5.24231		3.77191	3.20736	0.0363877
5914.34	0.000594631	5.2445		3.77191	3.22575	0.0363573
5914.34	0.000569971	5.2466		3.77191	3.24415	0.0363282
5914.34	0.000546334	5.24862		3.77191	3.26254	0.0363002
5914.34	0.000523677	5.25056		3.77191	3.28094	0.0362734
5914.34	0.00050196	5.25243		3.77191	3.29933	0.0362476
5914.34	0.000481143	5.25422		3.77191	3.31773	0.036223
5914.34	0.00046119	5.25594		3.77191	3.33612	0.0361993
5914.34	0.000442064	5.25759		3.77191	3.35452	0.0361766
5914.34	0.000423731	5.25917		3.77191	3.37291	0.0361548
5914.34	0.000406159	5.26069		3.77191	3.3913	0.0361339
5914.34	0.000389315	5.26215		3.77191	3.4097	0.0361138
5914.34	0.00037317	5.26355		3.77191	3.42809	0.0360946
5914.34	0.000357694	5.2649		3.77191	3.44649	0.0360762
5914.34	0.00034286	5.26619		3.77191	3.46488	0.0360585
5914.34	0.000328642	5.26742		3.77191	3.48328	0.0360415
5914.34	0.000315012	5.26861		3.77191	3.50167	0.0360253
5914.34	0.000301949	5.26975		3.77191	3.52007	0.0360097
5914.34	0.000289427	5.27085		3.77191	3.53846	0.0359947
5914.34	0.000277424	5.2719		3.77191	3.55686	0.0359804
5914.34	0.000265919	5.27291		3.77191	3.57525	0.0359666
5914.34	0.000254891	5.27387		3.77191	3.59365	0.0359534
5914.34	0.00024432	5.2748		3.77191	3.61204	0.0359408
5914.34	0.000234188	5.27569		3.77191	3.63043	0.0359287
5914.34	0.000224476	5.27655		3.77191	3.64883	0.035917
5914.34	0.000215167	5.27737		3.77191	3.66722	0.0359059
5914.34	0.000206244	5.27815		3.77191	3.68562	0.0358952
5914.34	0.000197691	5.27891		3.77191	3.70401	0.0358849
5914.34	0.000189492	5.27963		3.77191	3.72241	0.0358751
5914.34	0.000181634	5.28032		3.77191	3.7408	0.0358657
5914.34	0.000174102	5.28099		3.77191	3.7592	0.0358566
5914.34	0.000166881	5.28163		3.77191	3.77759	0.035848
5914.34	0.000159961	5.28224		3.77191	3.79599	0.0358397
5914.34	0.000153327	5.28282		3.77191	3.81438	0.0358317
5914.34	0.000146968	5.28339		3.77191	3.83278	0.0358241
5914.34	0.000140874	5.28393		3.77191	3.85117	0.0358168
5914.34	0.000135031	5.28445		3.77191	3.86957	0.0358097
5914.34	0.000129432	5.28494		3.77191	3.88796	0.035803
5914.34	0.000124064	5.28542		3.77191	3.90635	0.0357966
5914.34	0.000118919	5.28588		3.77191	3.92475	0.0357904
5914.34	0.000113987	5.28631		3.77191	3.94314	0.0357844
5914.34	0.00010926	5.28673		3.77191	3.96154	0.0357788
5914.34	0.000104729	5.28714		3.77191	3.97993	0.0357733
5914.34	0.000100386	5.28752		3.77191	3.99833	0.0357681
5914.34	9.62227e-05	5.28789		3.77191	4.01672	0.0357631
5914.34	9.22323e-05	5.28825		3.77191	4.03512	0.0357583
5914.34	8.84073e-05	5.28859		3.77191	4.05351	0.0357537
5914.34	8.4741e-05	5.28891		3.77191	4.07191	0.0357493
5914.34	8.12267e-05	5.28923		3.77191	4.0903	0.035745
5914.34	7.78582e-05	5.28953		3.77191	4.1087	0.035741
5914.34	7.46294e-05	5.28982		3.77191	4.12709	0.0357371
5914.34	7.15344e-05	5.29009		3.77191	4.14548	0.0357333
5914.34	6.85678e-05	5.29036		3.77191	4.16388	0.0357298
5914.34	6.57243e-05	5.29061		3.77191	4.18227	0.0357263
5914.34	6.29986e-05	5.29085		3.77191	4.20067	0.0357231
5914.34	6.0386e-05	5.29109		3.77191	4.21906	0.0357199
5914.34	5.78818e-05	5.29131		3.77191	4.23746	0.0357169
5914.34	5.54814e-05	5.29152		3.77191	4.25585	0.035714
5914.34	5.31805e-05	5.29173		3.77191	4.27425	0.0357112
5914.34	5.09751e-05	5.29193		3.77191	4.29264	0.0357086
5914.34	4.88611e-05	5.29211		3.77191	4.31104	0.035706
5914.34	4.68348e-05	5.2923		3.77191	4.32943	0.0357036
5914.34	4.48925e-05	5.29247		3.77191	4.34783	0.0357012
5914.34	4.30308e-05	5.29264		3.77191	4.36622	0.035699
5914.34	4.12463e-05	5.2928		3.77191	4.38462	0.0356968
5914.34	3.95357e-05	5.29295		3.77191	4.40301	0.0356948
5914.34	3.78962e-05	5.29309		3.77191	4.4214	0.0356928
5914.34	3.63246e-05	5.29324		3.77191	4.4398	0.0356909
5914.34	3.48182e-05	5.29337		3.77191	4.45819	0.0356891
5914.34	3.33742e-05	5.2935		3.77191	4.47659	0.0356874
5914.34	3.19902e-05	5.29362		3.77191	4.49498	0.0356857
5914.34	3.06635e-05	5.29374		3.77191	4.51338	0.0356841
5914.34	2.93919e-05	5.29386		3.77191	4.53177	0.0356825
5914.34	2.8173e-05	5.29396		3.77191	4.55017	0.0356811
5914.34	2.70046e-05	5.29407		3.77191	4.56856	0.0356797
5914.34	2.58847e-05	5.29417		3.77191	4.58696	0.0356783
5914.34	2.48113e-05	5.29427		3.77191	4.60535	0.035677
5914.34	2.37823e-05	5.29436		3.77191	4.62375	0.0356758
5914.34	2.2796e-05	5.29445		3.77191	4.64214	0.0356746
5914.34	2.18507e-05	5.29453		3.77191	4.66054	0.0356734
5914.34	2.09445e-05	5.29461		3.77191	4.67893	0.0356724
5914.34	2.00759e-05	5.29469		3.77191	4.69732	0.0356713
5914.34	1.92434e-05	5.29476		3.77191	4.71572	0.0356703
5914.34	1.84453e-05	5.29484		3.77191	4.73411	0.0356693
5914.34	1.76804e-05	5.2949		3.77191	4.75251	0.0356684
5914.34	1.69472e-05	5.29497		3.77191	4.7709	0.0356675
5914.34	1.62444e-05	5.29503		3.77191	4.7893	0.0356667
5914.34	1.55707e-05	5.29509		3.77191	4.80769	0.0356659
5914.34	1.4925e-05	5.29515		3.77191	4.82609	0.0356651
5914.34	1.4306e-05	5.29521		3.77191	4.84448	0.0356643
5914.34	1.37127e-05	5.29526		3.77191	4.86288	0.0356636
5914.34	1.3144e-05	5.29531		3.77191	4.88127	0.0356629
5914.34	1.2599e-05	5.29536		3.77191	4.89967	0.0356623
5914.34	1.20765e-05	5.29541		3.77191	4.91806	0.0356617
5914.34	1.15756e-05	5.29545		3.77191	4.93645	0.035661
5914.34	1.10956e-05	5.29549		3.77191	4.95485	0.0356605
5914.34	1.06354e-05	5.29554		3.77191	4.97324	0.0356599
5914.34	1.01944e-05	5.29557		3.77191	4.99164	0.0356594
5914.34	9.77162e-06	5.29561		3.77191	5.01003	0.0356589
5914.34	9.36638e-06	5.29565		3.77191	5.02843	0.0356584
5914.34	8.97795e-06	5.29568		3.77191	5.04682	0.0356579
5914.34	8.60563e-06	5.29572		3.77191	5.06522	0.0356575
5914.34	8.24875e-06	5.29575		3.77191	5.08361	0.035657
5914.34	7.90666e-06	5.29578		3.77191	5.10201	0.0356566
5914.34	7.57877e-06	5.29581		3.77191	5.1204	0.0356562
5914.34	7.26447e-06	5.29584		3.77191	5.1388	0.0356558
5914.34	6.96321e-06	5.29586		3.77191	5.15719	0.0356555
5914.34	6.67444e-06	5.29589		3.77191	5.17559	0.0356551
5914.34	6.39764e-06	5.29592		3.77191	5.19398	0.0356548
5914.34	6.13233e-06	5.29594		3.77191	5.21237	0.0356545
5914.34	5.87802e-06	5.29596		3.77191	5.23077	0.0356542
5914.34	5.63425e-06	5.29598		3.77191	5.24916	0.0356539
5914.34	5.40059e-06	5.296		3.77191	5.26756	0.0356536
5914.34	5.17663e-06	5.29602		3.77191	5.28595	0.0356533
5914.34	4.96195e-06	5.29604		3.77191	5.30435	0.0356531
5914.34	4.75617e-06	5.29606		3.77191	5.32274	0.0356528
5914.34	4.55893e-06	5.29608		3.77191	5.34114	0.0356526
5914.34	4.36987e-06	5.2961		3.77191	5.35953	0.0356523
5914.34	4.18865e-06	5.29611		3.77191	5.37793	0.0356521
5914.34	4.01494e-06	5.29613		3.77191	5.39632	0.0356519
5914.34	3.84844e-06	5.29614		3.77191	5.41472	0.0356517
5914.34	3.68884e-06	5.29616		3.77191	5.43311	0.0356515
5914.34	3.53586e-06	5.29617		3.77191	5.45151	0.0356513
5914.34	3.38922e-06	5.29619		3.77191	5.4699	0.0356512
5914.34	3.24867e-06	5.2962		3.77191	5.48829	0.035651
5914.34	3.11395e-06	5.29621		3.77191	5.50669	0.0356508
5914.34	2.98481e-06	5.29622		3.77191	5.52508	0.0356507
5914.34	2.86103e-06	5.29623		3.77191	5.54348	0.0356505
5914.34	2.74238e-06	5.29624		3.77191	5.56187	0.0356504
5914.34	2.62865e-06	5.29625		3.77191	5.58027	0.0356502
5914.34	2.51964e-06	5.29626		3.77191	5.59866	0.0356501
5914.34	2.41514e-06	5.29627		3.77191	5.61706	0.03565
5914.34	2.31499e-06	5.29628		3.77191	5.63545	0.0356499
5914.34	2.21898e-06	5.29629		3.77191	5.65385	0.0356497
5914.34	2.12696e-06	5.2963		3.77191	5.67224	0.0356496
5914.34	2.03875e-06	5.29631		3.77191	5.69064	0.0356495
5914.34	1.9542e-06	5.29631		3.77191	5.70903	0.0356494
5914.34	1.87316e-06	5.29632		3.77191	5.72742	0.0356493
5914.34	1.79548e-06	5.29633		3.77191	5.74582	0.0356492
5914.34	1.72102e-06	5.29633		3.77191	5.76421	0.0356491
5914.34	1.64965e-06	5.29634		3.77191	5.78261	0.0356491
5914.34	1.58124e-06	5.29635		3.77191	5.801	0.035649
5914.34	1.51566e-06	5.29635		3.77191	5.8194	0.0356489
5914.34	1.45281e-06	5.29636		3.77191	5.83779	0.0356488
5914.34	1.39256e-06	5.29636		3.77191	5.85619	0.0356488
5914.34	1.33481e-06	5.29637		3.77191	5.87458	0.0356487
5914.34	1.27945e-06	5.29637		3.77191	5.89298	0.0356486
5914.34	1.22639e-06	5.29638		3.77191	5.91137	0.0356486
5914.34	1.17553e-06	5.29638		3.77191	5.92977	0.0356485
5914.34	1.12678e-06	5.29639		3.77191	5.94816	0.0356484
5914.34	1.08005e-06	5.29639		3.77191	5.96656	0.0356484
5914.34	1.03526e-06	5.2964		3.77191	5.98495	0.0356483
5914.34	9.92329e-07	5.2964		3.77191	6.00334	0.0356483
5914.34	9.51176e-07	5.2964		3.77191	6.02174	0.0356482
5914.34	9.1173e-07	5.29641		3.77191	6.04013	0.0356482
5914.34	8.7392e-07	5.29641		3.77191	6.05853	0.0356481
5914.34	8.37678e-07	5.29641		3.77191	6.07692	0.0356481
5914.34	8.02938e-07	5.29642		3.77191	6.09532	0.035648
5914.34	7.6964e-07	5.29642		3.77191	6.11371	0.035648
5914.34	7.37722e-07	5.29642		3.77191	6.13211	0.035648
5914.34	7.07128e-07	5.29643		3.77191	6.1505	0.0356479
5914.34	6.77803e-07	5.29643		3.77191	6.1689	0.0356479
5914.34	6.49694e-07	5.29643		3.77191	6.18729	0.0356479
5914.34	6.22751e-07	5.29643		3.77191	6.20569	0.0356478
5914.34	5.96925e-07	5.29644		3.77191	6.22408	0.0356478
5914.34	5.7217e-07	5.29644		3.77191	6.24247	0.0356478
5914.34	5.48442e-07	5.29644		3.77191	6.26087	0.0356477
5914.34	5.25697e-07	5.29644		3.77191	6.27926	0.0356477
5914.34	5.03896e-07	5.29644		3.77191	6.29766	0.0356477
5914.34	4.82999e-07	5.29645		3.77191	6.31605	0.0356477
5914.34	4.62969e-07	5.29645		3.77191	6.33445	0.0356476
5914.34	4.43769e-07	5.29645		3.77191	6.35284	0.0356476
5914.34	4.25366e-07	5.29645		3.77191	6.37124	0.0356476
5914.34	4.07726e-07	5.29645		3.77191	6.38963	0.0356476
5914.34	3.90817e-07	5.29645		3.77191	6.40803	0.0356475
5914.34	3.74609e-07	5.29646		3.77191	6.42642	0.0356475
5914.34	3.59074e-07	5.29646		3.77191	6.44482	0.0356475
5914.34	3.44183e-07	5.29646		3.77191	6.46321	0.0356475
5914.34	3.29909e-07	5.29646		3.77191	6.48161	0.0356475
5914.34	3.16228e-07	5.29646		3.77191	6.5	0.0356475
6113.47	0.1	3.09648		3.78629	1	0.104295
6113.47	0.0958529	3.13113		3.78629	1.01839	0.102
6113.47	0.0918778	3.16567		3.78629	1.03679	0.0997859
6113.47	0.0880676	3.2001		3.78629	1.05518	0.09765
6113.47	0.0844153	3.23442		3.78629	1.07358	0.0955888
6113.47	0.0809146	3.26862		3.78629	1.09197	0.093599
6113.47	0.077559	3.30269		3.78629	1.11037	0.0916776
6113.47	0.0743426	3.33664		3.78629	1.12876	0.0898217
6113.47	0.0712595	3.37045		3.78629	1.14716	0.0880287
6113.47	0.0683043	3.40412		3.78629	1.16555	0.086296
6113.47	0.0654717	3.43764		3.78629	1.18395	0.0846212
6113.47	0.0627565	3.47101		3.78629	1.20234	0.0830019
6113.47	0.060154	3.50422		3.78629	1.22074	0.081436
6113.47	0.0576593	3.53727		3.78629	1.23913	0.0799215
6113.47	0.0552681	3.57015		3.78629	1.25753	0.0784563
6113.47	0.0529761	3.60285		3.78629	1.27592	0.0770386
6113.47	0.0507792	3.63536		3.78629	1.29431	0.0756667
6113.47	0.0486733	3.66769		3.78629	1.31271	0.0743389
6113.47	0.0466548	3.69981		3.78629	1.3311	0.0730534
6113.47	0.04472	3.73173		3.78629	1.3495	0.071809
6113.47	0.0428654	3.76344		3.78629	1.36789	0.070604
6113.47	0.0410878	3.79494		3.78629	1.38629	0.0694371
6113.47	0.0393838	3.8262		3.78629	1.40468	0.0683069
6113.47	0.0377505	3.85723		3.78629	1.42308	0.0672123
6113.47	0.036185	3.88802		3.78629	1.44147	0.066152
6113.47	0.0346844	3.91856		3.78629	1.45987	0.0651249
6113.47	0.033246	3.94884		3.78629	1.47826	0.0641299
6113.47	0.0318672	3.97886		3.78629	1.49666	0.0631659
6113.47	0.0305457	4.00861		3.78629	1.51505	0.0622319
6113.47	0.0292789	4.03807		3.78629	1.53344	0.061327
6113.47	0.0280647	4.06725		3.78629	1.55184	0.0604502
6113.47	0.0269008	4.09614		3.78629	1.57023	0.0596007
6113.47	0.0257852	4.12472		3.78629	1.58863	0.0587776
6113.47	0.0247159	4.15299		3.78629	1.60702	0.0579801
6113.47	0.0236909	4.18094		3.78629	1.62542	0.0572074
6113.47	0.0227084	4.20857		3.78629	1.64381	0.0564588
6113.47	0.0217667	4.23586		3.78629	1.66221	0.0557335
6113.47	0.020864	4.26282		3.78629	1.6806	0.0550309
6113.47	0.0199988	4.28942		3.78629	1.699	0.0543503
6113.47	0.0191694	4.31568		3.78629	1.71739	0.053691
6113.47	0.0183744	4.34158		3.78629	1.73579	0.0530524
6113.47	0.0176124	4.3671		3.78629	1.75418	0.052434
6113.47	0.016882	4.39226		3.78629	1.77258	0.0518351
6113.47	0.0161819	4.41704		3.78629	1.79097	0.0512551
6113.47	0.0155108	4.44144		3.78629	1.80936	0.0506936
6113.47	0.0148676	4.46544		3.78629	1.82776	0.05015
6113.47	0.014251	4.48906		3.78629	1.84615	0.0496237
6113.47	0.01366	4.51228		3.78629	1.86455	0.0491144
6113.47	0.0130935	4.53509		3.78629	1.88294	0.0486215
6113.47	0.0125505	4.5575		3.78629	1.90134	0.0481445
6113.47	0.0120301	4.5795		3.78629	1.91973	0.047683
6113.47	0.0115312	4.60109		3.78629	1.93813	0.0472366
6113.47	0.011053	4.62226		3.78629	1.95652	0.0468048
6113.47	0.0105946	4.64302		3.78629	1.97492	0.0463872
6113.47	0.0101552	4.66336		3.78629	1.99331	0.0459835
6113.47	0.00973407	4.68328		3.78629	2.01171	0.0455931
6113.47	0.00933039	4.70278		3.78629	2.0301	0.0452158
6113.47	0.00894345	4.72186		3.78629	2.04849	0.0448511
6113.47	0.00857256	4.74052		3.78629	2.06689	0.0444987
6113.47	0.00821705	4.75877		3.78629	2.08528	0.0441582
6113.47	0.00787628	4.77659		3.78629	2.10368	0.0438293
6113.47	0.00754964	4.79399		3.78629	2.12207	0.0435116
6113.47	0.00723655	4.81098		3.78629	2.14047	0.0432049
6113.47	0.00693645	4.82755		3.78629	2.15886	0.0429087
6113.47	0.00664879	4.84372		3.78629	2.17726	0.0426228
6113.47	0.00637306	4.85948		3.78629	2.19565	0.0423469
6113.47	0.00610876	4.87483		3.78629	2.21405	0.0420806
6113.47	0.00585543	4.88978		3.78629	2.23244	0.0418236
6113.47	0.0056126	4.90433		3.78629	2.25084	0.0415758
6113.47	0.00537984	4.91849		3.78629	2.26923	0.0413367
6113.47	0.00515673	4.93227		3.78629	2.28763	0.0411062
6113.47	0.00494288	4.94566		3.78629	2.30602	0.0408839
6113.47	0.00473789	4.95867		3.78629	2.32441	0.0406696
6113.47	0.00454141	4.97131		3.78629	2.34281	0.040463
6113.47	0.00435307	4.98358		3.78629	2.3612	0.040264
6113.47	0.00417255	4.9955		3.78629	2.3796	0.0400721
6113.47	0.00399951	5.00706		3.78629	2.39799	0.0398873
6113.47	0.00383365	5.01827		3.78629	2.41639	0.0397093
6113.47	0.00367466	5.02914		3.78629	2.43478	0.0395379
6113.47	0.00352227	5.03967		3.78629	2.45318	0.0393727
6113.47	0.0033762	5.04988		3.78629	2.47157	0.0392138
6113.47	0.00323619	5.05976		3.78629	2.48997	0.0390607
6113.47	0.00310198	5.06933		3.78629	2.50836	0.0389134
6113.47	0.00297334	5.07859		3.78629	2.52676	0.0387716
6113.47	0.00285003	5.08755		3.78629	2.54515	0.0386351
6113.47	0.00273184	5.09622		3.78629	2.56355	0.0385038
6113.47	0.00261855	5.1046		3.78629	2.58194	0.0383775
6113.47	0.00250995	5.1127		3.78629	2.60033	0.038256
6113.47	0.00240586	5.12053		3.78629	2.61873	0.0381391
6113.47	0.00230609	5.12809		3.78629	2.63712	0.0380267
6113.47	0.00221045	5.13539		3.78629	2.65552	0.0379186
6113.47	0.00211879	5.14244		3.78629	2.67391	0.0378147
6113.47	0.00203092	5.14925		3.78629	2.69231	0.0377148
6113.47	0.00194669	5.15582		3.78629	2.7107	0.0376187
6113.47	0.00186596	5.16216		3.78629	2.7291	0.0375264
6113.47	0.00178858	5.16827		3.78629	2.74749	0.0374377
6113.47	0.00171441	5.17417		3.78629	2.76589	0.0373524
6113.47	0.00164331	5.17985		3.78629	2.78428	0.0372705
6113.47	0.00157516	5.18534		3.78629	2.80268	0.0371917
6113.47	0.00150984	5.19062		3.78629	2.82107	0.0371161
6113.47	0.00144722	5.19571		3.78629	2.83946	0.0370434
6113.47	0.0013872	5.20061		3.78629	2.85786	0.0369736
6113.47	0.00132968	5.20533		3.78629	2.87625	0.0369065
6113.47	0.00127453	5.20988		3.78629	2.89465	0.0368421
6113.47	0.00122168	5.21426		3.78629	2.91304	0.0367803
6113.47	0.00117101	5.21847		3.78629	2.93144	0.0367209
6113.47	0.00112245	5.22253		3.78629	2.94983	0.0366639
6113.47	0.0010759	5.22643		3.78629	2.96823	0.0366091
6113.47	0.00103128	5.23019		3.78629	2.98662	0.0365565
6113.47	0.000988515	5.2338		3.78629	3.00502	0.0365061
6113.47	0.000947521	5.23728		3.78629	3.02341	0.0364576
6113.47	0.000908226	5.24063		3.78629	3.04181	0.0364111
6113.47	0.000870561	5.24384		3.78629	3.0602	0.0363664
6113.47	0.000834458	5.24693		3.78629	3.0786	0.0363236
6113.47	0.000799853	5.24991		3.78629	3.09699	0.0362825
6113.47	0.000766682	5.25277		3.78629	3.11538	0.036243
6113.47	0.000734887	5.25551		3.78629	3.13378	0.0362051
6113.47	0.000704411	5.25815		3.78629	3.15217	0.0361687
6113.47	0.000675198	5.26069		3.78629	3.17057	0.0361339
6113.47	0.000647197	5.26313		3.78629	3.18896	0.0361004
6113.47	0.000620358	5.26547		3.78629	3.20736	0.0360683
6113.47	0.000594631	5.26772		3.78629	3.22575	0.0360374
6113.47	0.000569971	5.26989		3.78629	3.24415	0.0360079
6113.47	0.000546334	5.27196		3.78629	3.26254	0.0359795
6113.47	0.000523677	5.27396		3.78629	3.28094	0.0359523
6113.47	0.00050196	5.27587		3.78629	3.29933	0.0359262
6113.47	0.000481143	5.27771		3.78629	3.31773	0.0359011
6113.47	0.00046119	5.27948		3.78629	3.33612	0.0358771
6113.47	0.000442064	5.28118		3.78629	3.35452	0.0358541
6113.47	0.000423731	5.28281		3.78629	3.37291	0.035832
6113.47	0.000406159	5.28437		3.78629	3.3913	0.0358108
6113.47	0.000389315	5.28587		3.78629	3.4097	0.0357904
6113.47	0.00037317	5.28731		3.78629	3.42809	0.0357709
6113.47	0.000357694	5.2887		3.78629	3.44649	0.0357522
6113.47	0.00034286	5.29002		3.78629	3.46488	0.0357343
6113.47	0.000328642	5.2913		3.78629	3.48328	0.0357171
6113.47	0.000315012	5.29252		3.78629	3.50167	0.0357006
6113.47	0.000301949	5.29369		3.78629	3.52007	0.0356847
6113.47	0.000289427	5.29482		3.78629	3.53846	0.0356695
6113.47	0.000277424	5.2959		3.78629	3.55686	0.035655
6113.47	0.000265919	5.29694		3.78629	3.57525	0.035641
6113.47	0.000254891	5.29793		3.78629	3.59365	0.0356276
6113.47	0.00024432	5.29889		3.78629	3.61204	0.0356148
6113.47	0.000234188	5.2998		3.78629	3.63043	0.0356025
6113.47	0.000224476	5.30068		3.78629	3.64883	0.0355907
6113.47	0.000215167	5.30152		3.78629	3.66722	0.0355794
6113.47	0.000206244	5.30233		3.78629	3.68562	0.0355685
6113.47	0.000197691	5.30311		3.78629	3.70401	0.0355581
6113.47	0.000189492	5.30385		3.78629	3.72241	0.0355481
6113.47	0.000181634	5.30457		3.78629	3.7408	0.0355386
6113.47	0.000174102	5.30525		3.78629	3.7592	0.0355294
6113.47	0.000166881	5.30591		3.78629	3.77759	0.0355206
6113.47	0.000159961	5.30654		3.78629	3.79599	0.0355122
6113.47	0.000153327	5.30714		3.78629	3.81438	0.0355041
6113.47	0.000146968	5.30772		3.78629	3.83278	0.0354963
6113.47	0.000140874	5.30828		3.78629	3.85117	0.0354889
6113.47	0.000135031	5.30881		3.78629	3.86957	0.0354818
6113.47	0.000129432	5.30932		3.78629	3.88796	0.035475
6113.47	0.000124064	5.30981		3.78629	3.90635	0.0354684
6113.47	0.000118919	5.31028		3.78629	3.92475	0.0354621
6113.47	0.000113987	5.31073		3.78629	3.94314	0.0354561
6113.47	0.00010926	5.31116		3.78629	3.96154	0.0354503
6113.47	0.000104729	5.31158		3.78629	3.97993	0.0354448
6113.47	0.000100386	5.31198		3.78629	3.99833	0.0354395
6113.47	9.62227e-05	5.31236		3.78629	4.01672	0.0354344
6113.47	9.22323e-05	5.31272		3.78629	4.03512	0.0354295
6113.47	8.84073e-05	5.31307		3.78629	4.05351	0.0354249
6113.47	8.4741e-05	5.31341		3.78629	4.07191	0.0354204
6113.47	8.12267e-05	5.31373		3.78629	4.0903	0.0354161
6113.47	7.78582e-05	5.31404		3.78629	4.1087	0.035412
6113.47	7.46294e-05	5.31434		3.78629	4.12709	0.035408
6113.47	7.15344e-05	5.31462		3.78629	4.14548	0.0354042
6113.47	6.85678e-05	5.31489		3.78629	4.16388	0.0354006
6113.47	6.57243e-05	5.31515		3.78629	4.18227	0.0353971
6113.47	6.29986e-05	5.3154		3.78629	4.20067	0.0353938
6113.47	6.0386e-05	5.31564		3.78629	4.21906	0.0353906
6113.47	5.78818e-05	5.31587		3.78629	4.23746	0.0353876
6113.47	5.54814e-05	5.3161		3.78629	4.25585	0.0353846
6113.47	5.31805e-05	5.31631		3.78629	4.27425	0.0353818
6113.47	5.09751e-05	5.31651		3.78629	4.29264	0.0353791
6113.47	4.88611e-05	5.3167		3.78629	4.31104	0.0353765
6113.47	4.68348e-05	5.31689		3.78629	4.32943	0.035374
6113.47	4.48925e-05	5.31707		3.78629	4.34783	0.0353717
6113.47	4.30308e-05	5.31724		3.78629	4.36622	0.0353694
6113.47	4.12463e-05	5.3174		3.78629	4.38462	0.0353672
6113.47	3.95357e-05	5.31756		3.78629	4.40301	0.0353651
6113.47	3.78962e-05	5.31771		3.78629	4.4214	0.0353631
6113.47	3.63246e-05	5.31786		3.78629	4.4398	0.0353612
6113.47	3.48182e-05	5.318		3.78629	4.45819	0.0353593
6113.47	3.33742e-05	5.31813		3.78629	4.47659	0.0353576
6113.47	3.19902e-05	5.31826		3.78629	4.49498	0.0353559
6113.47	3.06635e-05	5.31838		3.78629	4.51338	0.0353542
6113.47	2.93919e-05	5.3185		3.78629	4.53177	0.0353527
6113.47	2.8173e-05	5.31861		3.78629	4.55017	0.0353512
6113.47	2.70046e-05	5.31872		3.78629	4.56856	0.0353498
6113.47	2.58847e-05	5.31882		3.78629	4.58696	0.0353484
6113.47	2.48113e-05	5.31892		3.78629	4.60535	0.0353471
6113.47	2.37823e-05	5.31901		3.78629	4.62375	0.0353458
6113.47	2.2796e-05	5.3191		3.78629	4.64214	0.0353446
[truncated: 88,001 more rows]
